# Supplementary material for: Role of SYT11 in human pan-cancer using comprehensive approaches
Source: Eur J Med Res. 2024 Jun 18;29:338. doi: 10.1186/s40001-024-01931-3 (PMC11186215; doi:10.1186/s40001-024-01931-3)
Supplement: Supplementary file 3 — Supplementary Material 3. [file 40001_2024_1931_MOESM3_ESM.xlsx]

## Sheet: Sheet1
TCGA ID	Multivariate Cox Regression Analysis (OS)
ACC (n=77)	Variables	Hazard Ratio	95%CI	p-value
	Sex	1.05	0.46-2.39	0.908
	Age at diagnosis	1.02	0.99-1.05	0.225
	Stage	7.43	2.95-18.72	< 0.0001
	SYT11	1.14	0.79-1.65	0.478
BLCA (n=404)	Variables	Hazard Ratio	95%CI	p-value
	Sex	0.9	0.65-1.25	0.516
	Age at diagnosis	1.03	1.01-1.05	0.0002
	Stage	2.05	1.41-2.98	0.0002
	SYT11	1.18	1.01-1.38	0.0387
BRCA (n=1057)	Variables	Hazard Ratio	95%CI	p-value
	Age at diagnosis	1.04	1.02-1.05	< 0.0001
	Stage	2.81	2.01-3.95	< 0.0001
	SYT11	1.05	0.89-1.23	0.565
CESC (n=285)	Variables	Hazard Ratio	95%CI	p-value
	Age at diagnosis	1.01	1.02-1.05	0.207
	Stage	2.12	2.01-3.95	0.0036
	SYT11	0.95	0.89-1.23	0.656
CHOL (n=36)	Variables	Hazard Ratio	95%CI	p-value
	Sex	1.37	0.52-3.62	0.53
	Age at diagnosis	1.01	0.97-1.05	0.686
	Stage	1.57	0.54-4.61	0.409
	SYT11	1	0.60-1.69	0.99
COAD (n=422)	Variables	Hazard Ratio	95%CI	p-value
	Sex	1.05	0.69-1.59	0.828
	Age at diagnosis	1.03	1.01-1.05	0.0007
	Stage	3.83	2.45-5.98	< 0.0001
	SYT11	1.03	0.84-1.27	0.784
ESCA (n=161)	Variables	Hazard Ratio	95%CI	p-value
	Sex	1.73	0.68-4.42	0.25
	Age at diagnosis	1	0.98-1.03	0.687
	Stage	2.93	1.72-4.98	< 0.0001
	SYT11	1.05	0.82-1.33	0.695
GBM (n=160)	Variables	Hazard Ratio	95%CI	p-value
	Age at diagnosis	1	0.69-1.44	0.998
	Stage	1.02	1.01-1.04	0.0011
	SYT11	0.94	0.79-1.12	0.565
HNSC (n=445)	Variables	Hazard Ratio	95%CI	p-value
	Sex	0.82	0.60-1.13	0.228
	Age at diagnosis	1.02	1.01-1.03	0.0042
	Stage	1.91	1.29-2.85	0.0013
	SYT11	0.86	0.75-0.99	0.0375
KICH (n=65)	Variables	Hazard Ratio	95%CI	p-value
	Sex	0.55	0.10-3.09	0.502
	Age at diagnosis	1.05	0.99-1.12	0.09
	Stage	10.69	2.07-55.07	0.00462
	SYT11	1.34	0.60-3.00	0.478
KIRC (n=528)	Variables	Hazard Ratio	95%CI	p-value
	Sex	1.06	0.77-1.45	0.729
	Age at diagnosis	1.03	1.01-1.04	8.68e-05
	Stage	3.82	2.79-5.24	< 0.0001
	SYT11	0.85	0.73-1.00	0.0444
KIRP (n=255)	Variables	Hazard Ratio	95%CI	p-value
	Sex	0.64	0.32-1.28	0.207
	Age at diagnosis	1	0.98-1.03	0.863
	Stage	6.23	3.23-12.04	< 0.0001
	SYT11	0.93	0.67-1.29	0.663
LAML (n=149)	Variables	Hazard Ratio	95%CI	p-value
	Sex	0.87	0.57-1.34	0.524
	Age at diagnosis	1.04	1.02-1.06	< 0.0001
	SYT11	1	0.82-1.24	0.963
LIHC (n=341)	Variables	Hazard Ratio	95%CI	p-value
	Sex	0.87	0.60-1.28	0.484
	Age at diagnosis	1.01	1.00-1.03	0.0992
	Stage	2.49	1.71-3.61	< 0.0001
	SYT11	1.07	0.88-1.29	0.486
LUAD (n=485)	Variables	Hazard Ratio	95%CI	p-value
	Sex	1.03	0.76-1.38	0.864
	Age at diagnosis	1.01	0.99-1.02	0.264
	Stage	2.5	1.83-3.43	< 0.0001
	SYT11	0.88	0.76-1.01	0.0753
LUSC (n=485)	Variables	Hazard Ratio	95%CI	p-value
	Sex	1.28	0.93-1.78	0.133
	Age at diagnosis	1.02	1.00-1.03	0.0407
	Stage	1.58	1.14-2.18	0.00544
	SYT11	1.13	0.98-1.29	0.0883
OV (n=302)	Variables	Hazard Ratio	95%CI	p-value
	Age at diagnosis	1.03	1.01-1.04	0.000258
	Stage	1.82	0.85-3.88	0.122
	SYT11	0.98	0.84-1.14	0.751
PAAD (n=174)	Variables	Hazard Ratio	95%CI	p-value
	Sex	0.79	0.52-1.19	0.26
	Age at diagnosis	1.02	1.00-1.04	0.0291
	Stage	0.86	0.27-2.76	0.799
	SYT11	0.84	0.98-1.29	0.0918
PRAD (n=497)	Variables	Hazard Ratio	95%CI	p-value
	Age at diagnosis	1.06	0.96-1.17	0.249
	SYT11	0.59	0.30-1.17	0.13
READ (n=145)	Variables	Hazard Ratio	95%CI	p-value
	Sex	0.95	0.38-2.42	0.919
	Age at diagnosis	1.08	1.03-1.14	0.00259
	Stage	3	1.14-7.91	0.0258
	SYT11	1.32	0.85-2.05	0.218
SARC (n=259)	Variables	Hazard Ratio	95%CI	p-value
	Sex	0.83	0.56-1.24	0.37
	Age at diagnosis	1.02	1.01-1.04	0.00863
	SYT11	0.9	0.74-1.11	0.325
SKCM (n=407)	Variables	Hazard Ratio	95%CI	p-value
	Sex	0.99	0.73-1.35	0.961
	Age at diagnosis	1.02	1.01-1.03	1.01e-05
	Stage	1.66	1.24-2.23	0.000751
	SYT11	0.86	0.74-1.00	0.049
STAD (n=374)	Variables	Hazard Ratio	95%CI	p-value
	Sex	1.15	0.82-1.63	0.416
	Age at diagnosis	1.03	1.01-1.04	0.00207
	Stage	2.16	1.52-3.07	< 0.0001
	SYT11	1.17	0.98-1.04	0.076
THCA (n=502)	Variables	Hazard Ratio	95%CI	p-value
	Sex	1.15	0.82-1.63	0.416
	Age at diagnosis	1.03	1.01-1.04	0.00207
	Stage	2.16	1.52-3.07	< 0.0001
	SYT11	1.17	0.98-1.04	0.076
THYM (n=119)	Variables	Hazard Ratio	95%CI	p-value
	Sex	0.87	0.23-3.32	0.84
	Age at diagnosis	1.06	1.00-1.12	0.0679
	SYT11	2.92	1.21-7.04	0.0173
UCEC (n=528)	Variables	Hazard Ratio	95%CI	p-value
	Age at diagnosis	1.03	1.01-1.06	0.00151
	Stage	4.12	2.67-6.37	1.64e-10
	SYT11	1.15	0.92-1.42	0.221
