# Supplementary material for: Role of SYT11 in human pan-cancer using comprehensive approaches
Source: Eur J Med Res. 2024 Jun 18;29:338. doi: 10.1186/s40001-024-01931-3 (PMC11186215; doi:10.1186/s40001-024-01931-3)
Supplement: Supplementary file 5 — Supplementary Material 5. [file 40001_2024_1931_MOESM5_ESM.xlsx]

## Sheet: Reactome 2022
	Reactome 2022
Index	Term	P-value	Adjusted P-value	Odds Ratio	Combined Score	Genes
1	Synthesis Of PIPs At Plasma Membrane R-HSA-1660499	4.27815e-18	5.48447e-16	266.96	10676.5	SYNJ1;INPP5J;PIK3R3;INPP5K;PIP5K1A;PIP5K1B;PIP5K1C;SYNJ2;PIK3R5
2	Clathrin-mediated Endocytosis R-HSA-8856828	6.3773e-18	5.48447e-16	119.021	4712.48	ACTR3;ACTR2;DAB2;SYNJ1;ARPC2;SGIP1;ARPC3;ARPC1A;PIP5K1C;SYNJ2;ARPC5
3	PI Metabolism R-HSA-1483255	4.03038e-16	2.31075e-14	153.354	5436.03	SYNJ1;INPP5J;PIK3R3;INPP5K;PIP5K1A;PIP5K1B;PIP5K1C;SYNJ2;PIK3R5
4	Phospholipid Metabolism R-HSA-1483257	2.11578e-12	9.01336e-11	55.8995	1502.67	SYNJ1;INPP5J;PIK3R3;INPP5K;PIP5K1A;PIP5K1B;PIP5K1C;SYNJ2;PIK3R5
5	EPHB-mediated Forward Signaling R-HSA-3928662	2.62016e-12	9.01336e-11	224.966	5999.35	ACTR3;ACTR2;ARPC2;ARPC3;ARPC1A;ARPC5
6	RHO GTPases Activate WASPs And WAVEs R-HSA-5663213	3.78857e-12	1.08606e-10	209.947	5521.41	ACTR3;ACTR2;ARPC2;ARPC3;ARPC1A;ARPC5
7	Membrane Trafficking R-HSA-199991	4.83477e-11	1.18797e-09	25.9059	615.331	ACTR3;ACTR2;DAB2;SYNJ1;ARPC2;SGIP1;ARPC3;ARPC1A;PIP5K1C;SYNJ2;ARPC5
8	Vesicle-mediated Transport R-HSA-5653656	9.32727e-11	1.82504e-09	24.2856	560.888	ACTR3;ACTR2;DAB2;SYNJ1;ARPC2;SGIP1;ARPC3;ARPC1A;PIP5K1C;SYNJ2;ARPC5
9	FCGR3A-mediated Phagocytosis R-HSA-9664422	9.54964e-11	1.82504e-09	116.497	2687.81	ACTR3;ACTR2;ARPC2;ARPC3;ARPC1A;ARPC5
10	Regulation Of Actin Dynamics For Phagocytic Cup Formation R-HSA-2029482	1.17071e-10	2.01363e-09	112.325	2568.68	ACTR3;ACTR2;ARPC2;ARPC3;ARPC1A;ARPC5
11	Axon Guidance R-HSA-422475	2.92647e-10	4.57594e-09	25.4957	559.684	ACTR3;ACTR2;CREB1;ARPC2;ARPC3;ARPC1A;PIK3R3;PIP5K1C;ARPC5;PDLIM7
12	Nervous System Development R-HSA-9675108	4.70532e-10	6.74429e-09	24.2243	520.269	ACTR3;ACTR2;CREB1;ARPC2;ARPC3;ARPC1A;PIK3R3;PIP5K1C;ARPC5;PDLIM7
13	Fcgamma Receptor (FCGR) Dependent Phagocytosis R-HSA-2029480	9.42294e-10	1.24673e-08	77.5595	1611.9	ACTR3;ACTR2;ARPC2;ARPC3;ARPC1A;ARPC5
14	EPH-Ephrin Signaling R-HSA-2682334	1.23976e-09	1.52313e-08	73.8947	1515.46	ACTR3;ACTR2;ARPC2;ARPC3;ARPC1A;ARPC5
15	Leishmania Infection R-HSA-9658195	1.60038e-08	1.8351e-07	31.978	574.019	ACTR3;ACTR2;CREB1;ARPC2;ARPC3;ARPC1A;ARPC5
16	Metabolism Of Lipids R-HSA-556833	1.35353e-07	1.45505e-06	14.9782	236.886	SYNJ1;INPP5J;PIK3R3;INPP5K;PIP5K1A;PIP5K1B;PIP5K1C;SYNJ2;PIK3R5
17	Developmental Biology R-HSA-1266738	2.95705e-07	2.99184e-06	11.8608	178.314	ACTR3;ACTR2;CREB1;ARPC2;ARPC3;ARPC1A;PIK3R3;PIP5K1C;ARPC5;PDLIM7
18	RHO GTPase Effectors R-HSA-195258	7.99937e-07	7.64384e-06	23.6686	332.277	ACTR3;ACTR2;ARPC2;ARPC3;ARPC1A;ARPC5
19	Signal Transduction R-HSA-162582	1.80396e-06	1.63306e-05	7.74195	102.391	ACTR3;SMAD1;ACTR2;ARPC1A;PIK3R3;ARPC5;PIK3R5;CREB1;ARPC2;ARPC3;PIP5K1A;PIP5K1B;PIP5K1C
20	PI5P, PP2A And IER3 Regulate PI3K/AKT Signaling R-HSA-6811558	8.65352e-06	7.44202e-05	37.1111	432.624	PIK3R3;PIP5K1A;PIP5K1B;PIP5K1C
21	Signaling By Rho GTPases R-HSA-194315	1.00661e-05	8.24459e-05	11.8059	135.842	ACTR3;ACTR2;ARPC2;ARPC3;ARPC1A;PIK3R3;ARPC5
22	Negative Regulation Of PI3K/AKT Network R-HSA-199418	1.11502e-05	8.71744e-05	34.7156	395.898	PIK3R3;PIP5K1A;PIP5K1B;PIP5K1C
23	Signaling By Rho GTPases, Miro GTPases And RHOBTB3 R-HSA-9716542	1.18093e-05	8.83131e-05	11.5071	130.566	ACTR3;ACTR2;ARPC2;ARPC3;ARPC1A;PIK3R3;ARPC5
24	Infectious Disease R-HSA-5663205	1.43622e-05	0.000102929	9.393	104.74	ACTR3;ACTR2;CREB1;ARPC2;SGIP1;ARPC3;ARPC1A;ARPC5
25	PIP3 Activates AKT Signaling R-HSA-1257604	1.77534e-05	0.000122143	18.7376	204.97	CREB1;PIK3R3;PIP5K1A;PIP5K1B;PIP5K1C
26	Intracellular Signaling By Second Messengers R-HSA-9006925	3.35288e-05	0.000221806	16.3405	168.358	CREB1;PIK3R3;PIP5K1A;PIP5K1B;PIP5K1C
27	Synthesis Of IP2, IP, And Ins In Cytosol R-HSA-1855183	0.000135251	0.000861601	144.659	1288.68	SYNJ1;INPP5J
28	Disease R-HSA-1643685	0.000154894	0.000951493	5.94354	52.1413	ACTR3;ACTR2;CREB1;ARPC2;SGIP1;ARPC3;ARPC1A;PIK3R3;ARPC5
29	Innate Immune System R-HSA-168249	0.000205731	0.0012202	7.16759	60.8452	ACTR3;ACTR2;CREB1;ARPC2;ARPC3;ARPC1A;ARPC5
30	Immune System R-HSA-168256	0.000364636	0.00209058	5.24719	41.5399	ACTR3;ACTR2;CREB1;ARPC2;SGIP1;ARPC3;ARPC1A;PIK3R3;ARPC5
31	Synthesis Of IP3 And IP4 In Cytosol R-HSA-1855204	0.000478624	0.00265559	72.2862	552.599	SYNJ1;INPP5J
32	Metabolism R-HSA-1430728	0.000542162	0.00291412	4.94531	37.1885	SYNJ1;INPP5J;PIK3R3;INPP5K;PIP5K1A;PIP5K1B;PIP5K1C;SYNJ2;PIK3R5
33	GPVI-mediated Activation Cascade R-HSA-114604	0.000727107	0.00378977	57.8116	417.772	PIK3R3;PIK3R5
34	RET Signaling R-HSA-8853659	0.00113646	0.00574914	45.6224	309.313	PIK3R3;PDLIM7
35	Inositol Phosphate Metabolism R-HSA-1483249	0.00163347	0.00802732	37.673	241.749	SYNJ1;INPP5J
36	Extra-nuclear Estrogen Signaling R-HSA-9009391	0.00373361	0.0178384	24.3772	136.278	CREB1;PIK3R3
37	MECP2 Regulates Transcription Factors R-HSA-9022707	0.00623494	0.028984	208.031	1056.3	CREB1
38	Cargo Recognition For Clathrin-Mediated Endocytosis R-HSA-8856825	0.00743142	0.0310007	16.942	83.0505	DAB2;SGIP1
39	APOBEC3G Mediated Resistance To HIV-1 R-HSA-180689	0.00747745	0.0310007	166.417	814.753	SGIP1
40	Binding And Entry Of HIV Virion R-HSA-173107	0.00747745	0.0310007	166.417	814.753	SGIP1
41	WNT Mediated Activation Of DVL R-HSA-201688	0.00747745	0.0310007	166.417	814.753	PIP5K1B
42	PI3K/AKT Signaling In Cancer R-HSA-2219528	0.00756995	0.0310007	16.7767	81.9302	CREB1;PIK3R3
43	MECP2 Regulates Transcription Of Neuronal Ligands R-HSA-9022702	0.00871846	0.0340813	138.674	657.634	CREB1
44	CREB Phosphorylation R-HSA-199920	0.00871846	0.0340813	138.674	657.634	CREB1
45	2-LTR Circle Formation R-HSA-164843	0.00995799	0.0372342	118.857	547.858	SGIP1
46	CREB1 Phosphorylation Thru Activation Of CaMKII/CaMKK/CaMKIV Cascasde R-HSA-442729	0.00995799	0.0372342	118.857	547.858	CREB1
47	Formation Of Annular Gap Junctions R-HSA-196025	0.011196	0.0409727	103.995	467.165	DAB2
48	AKT Phosphorylates Targets In Nucleus R-HSA-198693	0.0124326	0.0419295	92.4352	405.553	CREB1
49	Gap Junction Degradation R-HSA-190873	0.0124326	0.0419295	92.4352	405.553	DAB2
50	CaMK IV-mediated Phosphorylation Of CREB R-HSA-111932	0.0124326	0.0419295	92.4352	405.553	CREB1
51	Integration Of Provirus R-HSA-162592	0.0124326	0.0419295	92.4352	405.553	SGIP1
52	NOTCH2 Intracellular Domain Regulates Transcription R-HSA-2197563	0.0149012	0.0474632	75.6212	318.086	CREB1
53	CREB1 Phosphorylation Thru Activation Of Adenylate Cyclase R-HSA-442720	0.0149012	0.0474632	75.6212	318.086	CREB1
54	Erythropoietin Activates Phosphoinositide-3-kinase (PI3K) R-HSA-9027276	0.0149012	0.0474632	75.6212	318.086	PIK3R5
55	SEMA3A-Plexin Repulsion Signaling By Inhibiting Integrin Adhesion R-HSA-399955	0.017364	0.0543019	63.9808	259.337	PIP5K1C
56	Membrane Binding And Targetting Of GAG Proteins R-HSA-174490	0.0185931	0.0571075	59.4077	236.738	SGIP1
57	Early Phase Of HIV Life Cycle R-HSA-162594	0.0198208	0.0598101	55.4444	217.399	SGIP1
58	Gastrin-CREB Signaling Pathway Via PKC And MAPK R-HSA-881907	0.021047	0.0624152	51.9766	200.681	CREB1
59	Regulation Of Signaling By CBL R-HSA-912631	0.0222717	0.062799	48.9167	186.1	PIK3R3
60	MECP2 Regulates Neuronal Receptors And Channels R-HSA-9022699	0.0222717	0.062799	48.9167	186.1	CREB1
61	Assembly Of HIV Virion R-HSA-175474	0.0222717	0.062799	48.9167	186.1	SGIP1
62	ESR-mediated Signaling R-HSA-8939211	0.0228804	0.0631428	9.25152	34.9474	CREB1;PIK3R3
63	PKA-mediated Phosphorylation Of CREB R-HSA-111931	0.023495	0.0631428	46.1968	173.283	CREB1
64	Signaling By KIT In Disease R-HSA-9669938	0.023495	0.0631428	46.1968	173.283	PIK3R3
65	CD28 Dependent PI3K/Akt Signaling R-HSA-389357	0.0283733	0.0745023	37.7898	134.619	PIK3R3
66	G Alpha (Q) Signaling Events R-HSA-416476	0.0285881	0.0745023	8.18427	29.0931	CREB1;PIK3R3
67	Signaling By Erythropoietin R-HSA-9006335	0.0295893	0.0746231	36.1449	127.243	PIK3R5
68	Estrogen-dependent Nuclear Events Downstream Of ESR-membrane Signaling R-HSA-9634638	0.0295893	0.0746231	36.1449	127.243	CREB1
69	Interleukin-7 Signaling R-HSA-1266695	0.0308037	0.0746231	34.6372	120.541	PIK3R3
70	G Beta:Gamma Signaling Thru PI3Kgamma R-HSA-392451	0.0308037	0.0746231	34.6372	120.541	PIK3R5
71	Gap Junction Trafficking R-HSA-190828	0.0308037	0.0746231	34.6372	120.541	DAB2
72	Constitutive Signaling By AKT1 E17K In Cancer R-HSA-5674400	0.0320167	0.0752009	33.25	114.43	CREB1
73	Gap Junction Trafficking And Regulation R-HSA-157858	0.0332283	0.0752009	31.9696	108.836	DAB2
74	Signaling By BMP R-HSA-201451	0.0332283	0.0752009	31.9696	108.836	SMAD1
75	CREB1 Phosphorylation Thru NMDA Receptor-Mediated Activation Of RAS Signaling R-HSA-442742	0.0332283	0.0752009	31.9696	108.836	CREB1
76	Interleukin Receptor SHC Signaling R-HSA-912526	0.0332283	0.0752009	31.9696	108.836	PIK3R3
77	Budding And Maturation Of HIV Virion R-HSA-162588	0.035647	0.0796271	29.683	98.9659	SGIP1
78	MAPK Targets/ Nuclear Events Mediated By MAP Kinases R-HSA-450282	0.0368542	0.0812683	28.658	94.5941	CREB1
79	Regulation Of MECP2 Expression And Activity R-HSA-9022692	0.03806	0.0818289	27.7014	90.5446	CREB1
80	RUNX2 Regulates Bone Development R-HSA-8941326	0.03806	0.0818289	27.7014	90.5446	SMAD1
81	G-protein Beta:Gamma Signaling R-HSA-397795	0.0392642	0.0823591	26.8065	86.7843	PIK3R5
82	Signaling By NOTCH2 R-HSA-1980145	0.0392642	0.0823591	26.8065	86.7843	CREB1
83	Platelet Activation, Signaling And Aggregation R-HSA-76002	0.0397859	0.0823791	6.80573	21.9433	PIK3R3;PIK3R5
84	CaM Pathway R-HSA-111997	0.0404671	0.0823791	25.9674	83.2845	CREB1
85	GPCR Downstream Signaling R-HSA-388396	0.0409367	0.0823791	4.28549	13.6953	CREB1;PIK3R3;PIK3R5
86	Signaling By Nuclear Receptors R-HSA-9006931	0.0415032	0.0823791	6.64543	21.1457	CREB1;PIK3R3
87	CD28 Co-Stimulation R-HSA-389356	0.0416685	0.0823791	25.1793	80.0201	PIK3R3
88	Ca-dependent Events R-HSA-111996	0.0428684	0.0828468	24.4375	76.9688	CREB1
89	Vpr-mediated Nuclear Import Of PICs R-HSA-180910	0.0428684	0.0828468	24.4375	76.9688	SGIP1
90	Interactions Of Vpr With Host Cellular Proteins R-HSA-176033	0.0464596	0.0878138	22.4527	68.9112	SGIP1
91	FCGR3A-mediated IL10 Synthesis R-HSA-9664323	0.0464596	0.0878138	22.4527	68.9112	CREB1
92	DAG And IP3 Signaling R-HSA-1489509	0.0476538	0.088134	21.8607	66.5396	CREB1
93	NGF-stimulated Transcription R-HSA-9031628	0.0476538	0.088134	21.8607	66.5396	CREB1
94	Signaling By SCF-KIT R-HSA-1433557	0.0512278	0.093736	20.2581	60.1965	PIK3R3
95	Signaling By GPCR R-HSA-372790	0.0533537	0.0950491	3.83428	11.2376	CREB1;PIK3R3;PIK3R5
96	Interleukin-2 Family Signaling R-HSA-451927	0.0536033	0.0950491	19.314	56.5154	PIK3R3
97	Interleukin-3, Interleukin-5 And GM-CSF Signaling R-HSA-512988	0.0536033	0.0950491	19.314	56.5154	PIK3R3
98	Heme Signaling R-HSA-9707616	0.0547889	0.0961601	18.8741	54.8153	CREB1
99	Cytokine Signaling In Immune System R-HSA-1280215	0.0558422	0.0970188	3.76044	10.8497	CREB1;SGIP1;PIK3R3
100	PLC Beta Mediated Events R-HSA-112043	0.0571558	0.098308	18.0516	51.6633	CREB1
101	G-protein Mediated Events R-HSA-112040	0.0630483	0.106317	16.2778	44.9894	CREB1
102	Transcriptional Activation Of Mitochondrial Biogenesis R-HSA-2151201	0.0630483	0.106317	16.2778	44.9894	CREB1
103	Ion Transport By P-type ATPases R-HSA-936837	0.0642225	0.107245	15.9639	43.8274	ATP13A2
104	NCAM Signaling For Neurite Out-Growth R-HSA-375165	0.0689053	0.112874	14.8207	39.6457	CREB1
105	Neurexins And Neuroligins R-HSA-6794361	0.0689053	0.112874	14.8207	39.6457	PDLIM5
106	Transcriptional Regulation Of Granulopoiesis R-HSA-9616222	0.0712383	0.115594	14.3082	37.7983	CREB1
107	Transcriptional Regulation By MECP2 R-HSA-8986944	0.0724027	0.116085	14.065	36.9277	CREB1
108	Post NMDA Receptor Activation Events R-HSA-438064	0.0735657	0.116085	13.8299	36.0901	CREB1
109	Nuclear Events (Kinase And Transcription Factor Activation) R-HSA-198725	0.0735657	0.116085	13.8299	36.0901	CREB1
110	MAP Kinase Activation R-HSA-450294	0.0747273	0.116846	13.6025	35.2836	CREB1
111	Semaphorin Interactions R-HSA-373755	0.0770463	0.119387	13.1693	33.7575	PIP5K1C
112	Costimulation By CD28 Family R-HSA-388841	0.0816675	0.124613	12.3806	31.0146	PIK3R3
113	Circadian Clock R-HSA-400253	0.0828193	0.124613	12.1979	30.3862	CREB1
114	Interleukin-17 Signaling R-HSA-448424	0.0828193	0.124613	12.1979	30.3862	CREB1
115	Neuronal System R-HSA-112316	0.083317	0.124613	4.43637	11.0248	CREB1;PDLIM5
116	Activation Of NMDA Receptors And Postsynaptic Events R-HSA-442755	0.0885577	0.13131	11.3596	27.5368	CREB1
117	ISG15 Antiviral Mechanism R-HSA-1169408	0.0897012	0.131868	11.2055	27.0195	SGIP1
118	Constitutive Signaling By Aberrant PI3K In Cancer R-HSA-2219530	0.0931235	0.135739	10.7673	25.5598	PIK3R3
119	Diseases Of Signal Transduction By Growth Factor Receptors And Second Messengers R-HSA-5663202	0.0977374	0.141268	4.02905	9.36945	CREB1;PIK3R3
120	Antiviral Mechanism By IFN-stimulated Genes R-HSA-1169410	0.0988	0.141613	10.1082	23.3971	SGIP1
121	RAC2 GTPase Cycle R-HSA-9013404	0.103317	0.146049	9.63614	21.8736	PIK3R3
122	Opioid Signaling R-HSA-111885	0.104442	0.146049	9.5249	21.5179	CREB1
123	Protein-protein Interactions At Synapses R-HSA-6794362	0.104442	0.146049	9.5249	21.5179	PDLIM5
124	Mitochondrial Biogenesis R-HSA-1592230	0.105567	0.146431	9.41619	21.1715	CREB1
125	Signaling By Interleukins R-HSA-449147	0.109195	0.150253	3.76439	8.33668	CREB1;PIK3R3
126	HCMV Early Events R-HSA-9609690	0.1134	0.153581	8.7193	18.9805	CREB1
127	MyD88 Cascade Initiated On Plasma Membrane R-HSA-975871	0.1134	0.153581	8.7193	18.9805	CREB1
128	Neutrophil Degranulation R-HSA-6798695	0.115261	0.154882	3.64042	7.86533	ACTR2;ARPC5
129	TRAF6 Mediated Induction Of NFkB And MAP Kinases Upon TLR7/8 Or 9 Activation R-HSA-975138	0.118954	0.157884	8.28125	17.6309	CREB1
130	MyD88 Dependent Cascade Initiated On Endosome R-HSA-975155	0.120061	0.157884	8.19884	17.3795	CREB1
131	Toll Like Receptor 3 (TLR3) Cascade R-HSA-168164	0.121167	0.157884	8.11806	17.1339	CREB1
132	Toll Like Receptor 7/8 (TLR7/8) Cascade R-HSA-168181	0.121167	0.157884	8.11806	17.1339	CREB1
133	Toll Like Receptor 9 (TLR9) Cascade R-HSA-168138	0.124475	0.160976	7.88492	16.4294	CREB1
134	MyD88-independent TLR4 Cascade R-HSA-166166	0.125576	0.161187	7.81014	16.2049	CREB1
135	Signaling By Receptor Tyrosine Kinases R-HSA-9006934	0.126815	0.161572	3.42915	7.08127	CREB1;PIK3R3
136	MyD88:MAL(TIRAP) Cascade Initiated On Plasma Membrane R-HSA-166058	0.131057	0.165748	7.45646	15.1524	CREB1
137	Signaling By NTRK1 (TRKA) R-HSA-187037	0.13324	0.16728	7.32375	14.7618	CREB1
138	Transcriptional Regulation By RUNX2 R-HSA-8878166	0.138675	0.171598	7.01165	13.8524	SMAD1
139	Signaling By TGFB Family Members R-HSA-9006936	0.138675	0.171598	7.01165	13.8524	SMAD1
140	HCMV Infection R-HSA-9609646	0.14084	0.173032	6.8941	13.5133	CREB1
141	Host Interactions Of HIV Factors R-HSA-162909	0.150518	0.18361	6.41021	12.1388	SGIP1
142	ADORA2B Mediated Anti-Inflammatory Cytokine Production R-HSA-9660821	0.151587	0.183612	6.36058	11.9999	CREB1
143	Signaling By NTRKs R-HSA-166520	0.152654	0.183612	6.3117	11.8634	CREB1
144	Late Phase Of HIV Life Cycle R-HSA-162599	0.156911	0.187422	6.12346	11.3411	SGIP1
145	Toll Like Receptor 4 (TLR4) Cascade R-HSA-166016	0.161148	0.189952	5.94604	10.8541	CREB1
146	Hemostasis R-HSA-109582	0.161238	0.189952	2.9391	5.36349	PIK3R3;PIK3R5
147	HIV Life Cycle R-HSA-162587	0.170606	0.19962	5.58193	9.87108	SGIP1
148	Toll-like Receptor Cascades R-HSA-168898	0.184086	0.213938	5.12785	8.67812	CREB1
149	Anti-inflammatory Response Favoring Leishmania Infection R-HSA-9662851	0.187167	0.216059	5.03328	8.43454	CREB1
150	Ion Channel Transport R-HSA-983712	0.197357	0.226302	4.74162	7.69443	ATP13A2
151	RAC1 GTPase Cycle R-HSA-9013149	0.200389	0.228258	4.66055	7.4918	PIK3R3
152	Neurotransmitter Receptors And Postsynaptic Signal Transmission R-HSA-112314	0.204416	0.231313	4.55663	7.2341	CREB1
153	TCF Dependent Signaling In Response To WNT R-HSA-201681	0.220329	0.24769	4.18316	6.3276	PIP5K1B
154	Interferon Signaling R-HSA-913531	0.222296	0.247767	4.1407	6.22656	SGIP1
155	Ub-specific Processing Proteases R-HSA-5689880	0.223278	0.247767	4.11979	6.17696	SMAD1
156	Signaling By NOTCH R-HSA-157118	0.225238	0.24834	4.07859	6.07953	CREB1
157	HIV Infection R-HSA-162906	0.250294	0.274208	3.60874	4.99852	SGIP1
158	Transmission Across Chemical Synapses R-HSA-112315	0.266255	0.289847	3.35544	4.44027	CREB1
159	Organelle Biogenesis And Maintenance R-HSA-1852241	0.292731	0.316665	2.99589	3.68046	CREB1
160	Deubiquitination R-HSA-5688426	0.29631	0.318533	2.95219	3.59089	SMAD1
161	Signaling By WNT R-HSA-195721	0.309577	0.330728	2.79892	3.28187	PIP5K1B
162	G Alpha (I) Signaling Events R-HSA-418594	0.325181	0.345254	2.63451	2.95954	CREB1
163	RHO GTPase Cycle R-HSA-9012999	0.427508	0.451112	1.84991	1.57202	PIK3R3
164	Generic Transcription Pathway R-HSA-212436	0.443086	0.4647	1.37513	1.11934	SMAD1;CREB1
165	RNA Polymerase II Transcription R-HSA-73857	0.494917	0.515914	1.23896	0.871444	SMAD1;CREB1
166	Gene Expression (Transcription) R-HSA-74160	0.549681	0.569549	1.11343	0.666294	SMAD1;CREB1
167	Transport Of Small Molecules R-HSA-382551	0.593024	0.610779	1.13889	0.595093	ATP13A2
168	Cellular Responses To Stress R-HSA-2262752	0.601383	0.615701	1.11269	0.56583	CREB1
169	Adaptive Immune System R-HSA-1280218	0.607034	0.615721	1.09534	0.546764	PIK3R3
170	Cellular Responses To Stimuli R-HSA-8953897	0.608561	0.615721	1.0907	0.541706	CREB1
171	Post-translational Protein Modification R-HSA-597592	0.833463	0.838337	0.56057	0.102117	SMAD1
172	Metabolism Of Proteins R-HSA-392499	0.916528	0.916528	0.398932	0.0347718	SMAD1

## Sheet: BioPlanet 2019
	Reactome 2022
Index	Term	P-value	Adjusted P-value	Odds Ratio	Combined Score	Genes
1	PIP biosynthesis at the plasma membrane	5.4933e-20	1.19205e-17	467.602	20737.3	SYNJ1;INPP5J;PIK3R3;INPP5K;PIP5K1A;PIP5K1B;PIP5K1C;SYNJ2;PIK3R5
2	Phosphatidylinositol metabolism	3.5257e-18	3.82539e-16	273.485	10990.4	SYNJ1;INPP5J;PIK3R3;INPP5K;PIP5K1A;PIP5K1B;PIP5K1C;SYNJ2;PIK3R5
3	Fc gamma receptor-mediated phagocytosis	9.90372e-18	7.16369e-16	157.865	6180.99	ARPC2;ARPC3;ARPC1A;PIK3R3;PIP5K1A;PIP5K1B;ARPC4;PIP5K1C;ARPC5;PIK3R5
4	Rac1 cell motility signaling pathway	1.03237e-16	5.60061e-15	180.662	6650.09	ACTR3;ACTR2;ARPC2;ARPC3;PIP5K1A;PIP5K1B;ARPC4;PIP5K1C;ARPC5
5	Phosphatidylinositol signaling system	2.5153e-16	1.09164e-14	162.277	5828.83	SYNJ1;INPP5J;PIK3R3;INPP5K;PIP5K1A;PIP5K1B;PIP5K1C;SYNJ2;PIK3R5
6	Salmonella infection	1.83234e-15	6.62697e-14	1051	35663.8	ACTR3;ACTR2;ARPC2;ARPC3;ARPC1A;ARPC4
7	ERBB1 downstream pathway	4.439e-15	1.37609e-13	115.272	3809.55	ACTR3;SMAD1;ACTR2;CREB1;ARPC2;ARPC3;PIK3R3;ARPC4;ARPC5
8	PI3K subunit p85 role in regulation of actin organization and cell migration	1.58297e-14	4.2938e-13	630.474	20034.5	ACTR3;ACTR2;ARPC2;ARPC3;ARPC1A;ARPC4
9	Actin cytoskeleton regulation	7.83343e-14	1.88873e-12	60.9846	1840.38	ARPC2;ARPC3;ARPC1A;PIK3R3;PIP5K1A;PIP5K1B;ARPC4;PIP5K1C;ARPC5;PIK3R5
10	Y branching of actin filaments	1.06835e-13	2.31832e-12	420.211	12550.6	ACTR3;ACTR2;ARPC2;ARPC3;ARPC1A;ARPC4
11	Inositol phosphate metabolism	4.81388e-13	9.49648e-12	154.972	4395.34	SYNJ1;INPP5J;INPP5K;PIP5K1A;PIP5K1B;PIP5K1C;SYNJ2
12	Phospholipid metabolism	1.85566e-12	3.35565e-11	56.7637	1533.35	SYNJ1;INPP5J;PIK3R3;INPP5K;PIP5K1A;PIP5K1B;PIP5K1C;SYNJ2;PIK3R5
13	PDGFB signaling pathway	2.37152e-12	3.71213e-11	77.2154	2066.86	ACTR3;ACTR2;ARPC2;ARPC3;PIK3R3;ARPC4;ARPC5;PIK3R5
14	Bacterial invasion of epithelial cells	2.39492e-12	3.71213e-11	120.987	3237.33	ARPC2;ARPC3;ARPC1A;PIK3R3;ARPC4;ARPC5;PIK3R5
15	CDC42 signaling events	2.48075e-10	3.58882e-09	98.2451	2172.91	ACTR3;ACTR2;ARPC2;ARPC3;ARPC4;ARPC5
16	Lipid and lipoprotein metabolism	4.18523e-09	5.67622e-08	22.8457	440.733	SYNJ1;INPP5J;PIK3R3;INPP5K;PIP5K1A;PIP5K1B;PIP5K1C;SYNJ2;PIK3R5
17	Pathogenic Escherichia coli infection	7.99077e-09	1.02e-07	95.7837	1785.88	ARPC2;ARPC3;ARPC1A;ARPC4;ARPC5
18	Shigellosis	1.22981e-08	1.4826e-07	87.3596	1591.15	ARPC2;ARPC3;ARPC1A;ARPC4;ARPC5
19	Antigen-activated B-cell receptor generation of second messengers	1.92362e-07	2.19697e-06	30.4544	470.944	CREB1;PIK3R3;PIP5K1A;PIP5K1B;PIP5K1C;PIK3R5
20	Integrin signaling pathway	1.22838e-06	1.33279e-05	33.0417	449.691	ARPC2;ARPC3;ARPC1A;ARPC4;ARPC5
21	RhoA signaling pathway	2.36462e-05	0.000244344	64.7175	689.391	PIP5K1A;PIP5K1B;PIP5K1C
22	Metabolism	8.85742e-05	0.000873664	6.43373	60.0374	SYNJ1;INPP5J;PIK3R3;INPP5K;PIP5K1A;PIP5K1B;PIP5K1C;SYNJ2;PIK3R5
23	Endocytosis	0.000106139	0.00100139	19.123	174.99	DAB2;PIP5K1A;PIP5K1B;PIP5K1C
24	Prostate cancer	0.000182503	0.00165013	31.5365	271.489	CREB1;PIK3R3;PIK3R5
25	Endocytotic role of NDK, phosphins and dynamin	0.00020167	0.0017505	115.71	984.563	SYNJ1;SYNJ2
26	FSH regulation of apoptosis	0.000297402	0.00248216	14.4997	117.744	ACTR2;DAB2;ARPC1A;ARPC4
27	Insulin signaling pathway	0.000362099	0.00289421	13.7464	108.921	CREB1;PIK3R3;INPP5K;PIK3R5
28	Rho cell motility signaling pathway	0.000373447	0.00289421	82.6253	652.139	PIP5K1A;PIP5K1B
29	Glycoprotein VI-mediated activation cascade	0.000773425	0.00578736	55.9439	400.82	PIK3R3;PIK3R5
30	EGF receptor (ErbB1) signaling pathway	0.000870235	0.0062947	52.5481	370.293	PIK3R3;PIP5K1C
31	Signaling events regulated by Ret tyrosine kinase	0.00108046	0.00756322	46.8578	320.056	CREB1;PDLIM7
32	ERBB1 internalization pathway	0.00119382	0.00809561	44.4504	299.178	SYNJ1;PIK3R3
33	Aldosterone-regulated sodium reabsorption	0.00125256	0.0082365	43.337	289.602	PIK3R3;PIK3R5
34	Type 2 diabetes mellitus	0.00177122	0.0113046	36.0996	228.73	PIK3R3;PIK3R5
35	Endometrial cancer	0.00191433	0.0118688	34.6522	216.867	PIK3R3;PIK3R5
36	Non-small cell lung cancer	0.00206276	0.0124338	33.3161	206.017	PIK3R3;PIK3R5
37	Acute myeloid leukemia	0.00229533	0.0134618	31.4941	191.386	PIK3R3;PIK3R5
38	Colorectal cancer	0.00270922	0.0154711	28.8623	170.608	PIK3R3;PIK3R5
39	Focal adhesion	0.00297066	0.0161295	11.7065	68.1199	PIK3R3;PIP5K1C;PIK3R5
40	Glioma	0.00297318	0.0161295	27.4838	159.904	PIK3R3;PIK3R5
41	Pancreatic cancer	0.00343887	0.0177675	25.4565	144.405	PIK3R3;PIK3R5
42	Renal cell carcinoma	0.00343887	0.0177675	25.4565	144.405	PIK3R3;PIK3R5
43	Melanoma	0.00353585	0.0178437	25.0863	141.607	PIK3R3;PIK3R5
44	Chronic myeloid leukemia	0.00373361	0.0184135	24.3772	136.278	PIK3R3;PIK3R5
45	VEGF signaling pathway	0.00403974	0.0194805	23.3854	128.891	PIK3R3;PIK3R5
46	Signaling by SCF-KIT	0.00425012	0.0200495	22.7677	124.33	CREB1;PIK3R3
47	Fc epsilon receptor I signaling pathway	0.00435718	0.0201172	22.4709	122.15	PIK3R3;PIK3R5
48	Small cell lung cancer	0.00491116	0.0222025	21.0954	112.149	PIK3R3;PIK3R5
49	Progesterone-mediated oocyte maturation	0.00514139	0.022769	20.5911	108.524	PIK3R3;PIK3R5
50	ERBB signaling pathway	0.00611116	0.0265224	18.793	95.8	PIK3R3;PIK3R5
51	CREB phosphorylation through the activation of adenylate cyclase	0.00623494	0.0265291	208.031	1056.3	CREB1
52	Chagas disease	0.00743142	0.03042	16.942	83.0505	PIK3R3;PIK3R5
53	PIK3C1/B pathway	0.00747745	0.03042	166.417	814.753	PIK3R5
54	Amoebiasis	0.00756995	0.03042	16.7767	81.9302	PIK3R3;PIK3R5
55	CREB phosphorylation	0.00871846	0.0337902	138.674	657.634	CREB1
56	mTOR signaling pathway	0.00872005	0.0337902	15.5613	73.7937	PIK3R3;PIK3R5
57	CXCR4 signaling pathway	0.00917035	0.0348799	15.1495	71.0781	PIK3R3;PIK3R5
58	Leukocyte transendothelial migration	0.00932273	0.0348799	15.017	70.209	PIK3R3;PIK3R5
59	Neurotrophin signaling pathway	0.0107449	0.0395195	13.9208	63.1073	PIK3R3;PIK3R5
60	AKT phosphorylation of nuclear targets	0.011196	0.0398285	103.995	467.165	CREB1
61	Calcium/calmodulin-dependent protein kinase activation	0.011196	0.0398285	103.995	467.165	CREB1
62	Gap junction degradation	0.0124326	0.0434176	92.4352	405.553	DAB2
63	Natural killer cell-mediated cytotoxicity	0.0126051	0.0434176	12.7794	55.8926	PIK3R3;PIK3R5
64	T cell receptor signaling pathway	0.0129575	0.0436159	12.5916	54.7239	PIK3R3;PIK3R5
65	EGF/EGFR signaling pathway	0.0133141	0.0436159	12.4091	53.5942	CREB1;SYNJ1
66	Toll-like receptor signaling pathway regulation	0.0134941	0.0436159	12.3199	53.0433	PIK3R3;PIK3R5
67	ALK2 pathway	0.0136677	0.0436159	83.1875	357.101	SMAD1
68	TGF-beta signaling in gastrointestinal stem cells	0.0136677	0.0436159	83.1875	357.101	SMAD1
69	BMP signaling and regulation	0.0149012	0.0468633	75.6212	318.086	SMAD1
70	Integrated breast cancer pathway	0.0153516	0.04759	11.4928	47.9999	SMAD1;CREB1
71	Melanocyte development and pigmentation pathway	0.0161334	0.0486241	69.316	286.058	CREB1
72	PI3K class IB pathway	0.0161334	0.0486241	69.316	286.058	PIK3R5
73	Sema3A-plexin repulsion signaling by inhibiting integrin adhesion	0.017364	0.0509187	63.9808	259.337	PIP5K1C
74	CARM1 transcriptional regulation by protein methylation	0.017364	0.0509187	63.9808	259.337	CREB1
75	Arf6 vesicle-mediated transport	0.0185931	0.051727	59.4077	236.738	PIP5K1A
76	Repression of pain sensation by the transcriptional regulator DREAM	0.0185931	0.051727	59.4077	236.738	CREB1
77	BMP signaling pathway in stem cells	0.0185931	0.051727	59.4077	236.738	SMAD1
78	Calcium signaling by HBx of hepatitis B virus	0.0185931	0.051727	59.4077	236.738	CREB1
79	Hypoxia-inducible factor in the cardivascular system	0.0198208	0.0537639	55.4444	217.399	CREB1
80	LPA4-mediated signaling events	0.0198208	0.0537639	55.4444	217.399	CREB1
81	TGF-beta signaling pathway	0.0222045	0.0568584	9.40461	35.8077	SMAD1;DAB2
82	Human cytomegalovirus and MAP kinase pathways	0.0222717	0.0568584	48.9167	186.1	CREB1
83	Serotonin receptor 4/6/7 and NR3C signaling	0.0222717	0.0568584	48.9167	186.1	CREB1
84	CBL signaling regulation	0.0222717	0.0568584	48.9167	186.1	PIK3R3
85	PKA activation in glucagon signaling	0.0222717	0.0568584	48.9167	186.1	CREB1
86	Chemokine signaling pathway	0.0231076	0.0579365	9.20158	34.6678	PIK3R3;PIK3R5
87	Ras activation upon calcium influx through NMDA receptor	0.023495	0.0579365	46.1968	173.283	CREB1
88	Mitochondrial gene expression	0.023495	0.0579365	46.1968	173.283	CREB1
89	Estrogen receptor signaling pathway	0.0247168	0.0598761	43.7632	161.936	CREB1
90	Jak-STAT signaling pathway	0.0254309	0.0598761	8.73008	32.055	PIK3R3;PIK3R5
91	CD28-dependent PI3K/Akt signaling	0.0259371	0.0598761	41.5729	151.828	PIK3R3
92	E-cadherin keratinocyte pathway	0.0259371	0.0598761	41.5729	151.828	PIP5K1A
93	Oxidative stress-induced gene expression via Nrf2	0.0259371	0.0598761	41.5729	151.828	CREB1
94	p38 MK2 pathway	0.0259371	0.0598761	41.5729	151.828	CREB1
95	Platelet activation, signaling and aggregation	0.0268691	0.0607509	8.46948	30.6322	PIK3R3;PIK3R5
96	Gastrin-CREB signaling pathway via PKC and MAPK	0.027112	0.0607509	8.42754	30.4047	CREB1;PIK3R3
97	Epstein-Barr virus LMP1 signaling	0.0271559	0.0607509	39.5913	142.772	PDLIM7
98	Angiogenesis	0.0283733	0.0615701	37.7898	134.619	SMAD1
99	CREB transcription factor and its extracellular signals	0.0283733	0.0615701	37.7898	134.619	CREB1
100	Signaling by bone morphogenetic protein (BMP)	0.0283733	0.0615701	37.7898	134.619	SMAD1
101	Plexin D1 signaling	0.0295893	0.0629497	36.1449	127.243	PIP5K1B
102	SREBP signaling	0.0295893	0.0629497	36.1449	127.243	CREB1
103	ALK1 pathway	0.0320167	0.0667642	33.25	114.43	SMAD1
104	TGF-beta signaling in development	0.0320167	0.0667642	33.25	114.43	SMAD1
105	CTCF pathway	0.0332283	0.0667642	31.9696	108.836	SMAD1
106	TWEAK regulation of gene expression	0.0332283	0.0667642	31.9696	108.836	SMAD1
107	ERK5 role in neuronal survival pathway	0.0332283	0.0667642	31.9696	108.836	CREB1
108	FSH signaling pathway	0.0332283	0.0667642	31.9696	108.836	CREB1
109	G-protein beta-gamma signalling	0.0344384	0.0673255	30.784	103.698	PIK3R5
110	Interleukin receptor SHC signaling	0.0344384	0.0673255	30.784	103.698	PIK3R3
111	TRAIL signaling pathway	0.0344384	0.0673255	30.784	103.698	PIK3R3
112	Apoptosis	0.0364371	0.0689428	7.15036	23.6832	PIK3R3;PIK3R5
113	Gap junction trafficking and regulation	0.0368542	0.0689428	28.658	94.5941	DAB2
114	Signaling pathway from G-protein families	0.0368542	0.0689428	28.658	94.5941	CREB1
115	Nectin adhesion pathway	0.0368542	0.0689428	28.658	94.5941	PIP5K1C
116	Nuclear events mediated by MAP kinases	0.0368542	0.0689428	28.658	94.5941	CREB1
117	Alpha-V beta-3 integrin/OPN pathway	0.03806	0.0699916	27.7014	90.5446	PIP5K1A
118	CD28 co-stimulation	0.03806	0.0699916	27.7014	90.5446	PIK3R3
119	Hypothetical network for drug addiction	0.0392642	0.0710028	26.8065	86.7843	CREB1
120	Serotonin HTR1 group and FOS pathway	0.0392642	0.0710028	26.8065	86.7843	CREB1
121	MAPK/TRK pathway	0.0416685	0.0735127	25.1793	80.0201	CREB1
122	N-cadherin signaling events	0.0416685	0.0735127	25.1793	80.0201	PIP5K1C
123	Ephrin receptor A forward pathway	0.0416685	0.0735127	25.1793	80.0201	PIK3R5
124	Interleukin-7 signaling pathway	0.0428684	0.0750197	24.4375	76.9688	PIK3R3
125	PI3K/PLC/TRK pathway	0.0440669	0.0765002	23.7381	74.1114	CREB1
126	ALK in cardiac myocytes	0.045264	0.0767366	23.0775	71.4306	SMAD1
127	Activation of NMDA receptor upon glutamate binding and postsynaptic events	0.045264	0.0767366	23.0775	71.4306	CREB1
128	PI3K/AKT activation	0.045264	0.0767366	23.0775	71.4306	CREB1
129	EGFR interaction with phospholipase C-gamma	0.0464596	0.0769598	22.4527	68.9112	CREB1
130	ERBB4 signaling events	0.0464596	0.0769598	22.4527	68.9112	PIK3R3
131	p38 alpha/beta MAPK downstream pathway	0.0464596	0.0769598	22.4527	68.9112	CREB1
132	GAB1 signalosome	0.0476538	0.077751	21.8607	66.5396	CREB1
133	E-cadherin nascent AJ-like junctions pathway	0.0476538	0.077751	21.8607	66.5396	PIP5K1C
134	BMP receptor signaling	0.0512278	0.0823439	20.2581	60.1965	SMAD1
135	Signaling events mediated by T cell protein tyrosine phosphatase (TC-PTP)	0.0512278	0.0823439	20.2581	60.1965	PIK3R3
136	PI3K class IB pathway in neutrophils	0.0524162	0.0824958	19.7748	58.3068	PIK3R5
137	G-protein-mediated events	0.0536033	0.0824958	19.314	56.5154	CREB1
138	Heart development	0.0536033	0.0824958	19.314	56.5154	SMAD1
139	ERBB2/ERBB3 signaling events	0.0536033	0.0824958	19.314	56.5154	PIK3R3
140	Vasopressin-regulated water reabsorption	0.0536033	0.0824958	19.314	56.5154	CREB1
141	PI3K events in ERBB2 signaling	0.0536033	0.0824958	19.314	56.5154	CREB1
142	HNF3B pathway	0.0547889	0.0825638	18.8741	54.8153	CREB1
143	Integrin-linked kinase signaling	0.0547889	0.0825638	18.8741	54.8153	CREB1
144	Interleukin-3, interleukin-5, and GM-CSF signaling	0.0547889	0.0825638	18.8741	54.8153	PIK3R3
145	LKB1 signaling events	0.0571558	0.0855366	18.0516	51.6633	CREB1
146	Energy metabolism	0.0583371	0.0867066	17.6667	50.2001	CREB1
147	Arf6 integrin-mediated signaling pathway	0.059517	0.0878585	17.2977	48.8055	PIP5K1C
148	Pathways in cancer	0.0617985	0.0900018	5.29062	14.7284	PIK3R3;PIK3R5
149	Axon guidance	0.0617985	0.0900018	5.29062	14.7284	CREB1;PIP5K1C
150	Phospholipase C-mediated cascade	0.0653953	0.0946052	15.6619	42.7149	CREB1
151	Thromboxane A2 receptor signaling	0.0677367	0.0973435	15.0909	40.6266	PIK3R5
152	PI3K cascade	0.0689053	0.0983714	14.8207	39.6457	CREB1
153	ATF2 transcription factor network	0.0712383	0.101037	14.3082	37.7983	CREB1
154	Ephrin receptor B forward pathway	0.0724027	0.102022	14.065	36.9277	SYNJ1
155	Leptin signaling pathway	0.0735657	0.102992	13.8299	36.0901	CREB1
156	Circadian rhythm	0.0747273	0.103948	13.6025	35.2836	CREB1
157	ERK1/ERK2 MAPK pathway	0.0782036	0.107632	12.9629	33.0351	CREB1
158	HIF-1 transcriptional activity in hypoxia	0.0793596	0.107632	12.7628	32.338	CREB1
159	Semaphorin interactions	0.0793596	0.107632	12.7628	32.338	PIP5K1C
160	Thyroid-stimulating hormone signaling pathway	0.0793596	0.107632	12.7628	32.338	CREB1
161	G1 to S cell cycle control	0.0805143	0.107849	12.5688	31.6649	CREB1
162	SIDS susceptibility pathways	0.0805143	0.107849	12.5688	31.6649	CREB1
163	AMPK signaling	0.0816675	0.108723	12.3806	31.0146	PIK3R3
164	AP-1 transcription factor network	0.0839697	0.109768	12.0205	29.7784	CREB1
165	MicroRNA regulation of DNA damage response	0.0839697	0.109768	12.0205	29.7784	CREB1
166	NCAM signaling for neurite out-growth	0.0839697	0.109768	12.0205	29.7784	CREB1
167	Costimulation by the CD28 family	0.0862665	0.112095	11.6808	28.6215	PIK3R3
168	Myc repressed pathway	0.0874128	0.112908	11.5179	28.0705	CREB1
169	G alpha (12/13) signaling events	0.0919841	0.11811	10.9095	26.0317	PIK3R3
170	Opioid signaling	0.0953982	0.121085	10.4937	24.6569	CREB1
171	Developmental biology	0.0961866	0.121085	4.06844	9.52612	CREB1;PIP5K1C
172	Antigen processing and presentation	0.0965335	0.121085	10.362	24.2249	CREB1
173	MAP kinase signaling pathway	0.0965335	0.121085	10.362	24.2249	CREB1
174	Regular glucocorticoid receptor pathway	0.0976675	0.121108	10.2335	23.8051	CREB1
175	SMAD2/3 nuclear pathway	0.0976675	0.121108	10.2335	23.8051	CREB1
176	TGF-beta regulation of skeletal system development	0.101061	0.1239	9.86657	22.6145	SMAD1
177	MicroRNAs in cardiomyocyte hypertrophy	0.101061	0.1239	9.86657	22.6145	PIK3R3
178	Androgen receptor signaling, proteolysis, and transcription regulation	0.104442	0.127326	9.5249	21.5179	CREB1
179	Neural crest differentiation	0.107811	0.130699	9.20602	20.5052	SMAD1
180	Signaling by ERBB4	0.110051	0.132672	9.00498	19.8723	CREB1
181	Hemostasis pathway	0.115261	0.137861	3.64042	7.86533	PIK3R3;PIK3R5
182	Downstream signaling events Of B cell receptor (BCR)	0.115625	0.137861	8.53866	18.4213	CREB1
183	Granule cell survival pathway	0.116736	0.138425	8.45111	18.1516	CREB1
184	Melanogenesis	0.118954	0.140288	8.28125	17.6309	CREB1
185	Signaling by ERBB2	0.120061	0.140744	8.19884	17.3795	CREB1
186	Signaling by GPCR	0.120637	0.140744	2.66021	5.62625	CREB1;PIK3R3;PIK3R5
187	Fibroblast growth factor receptor pathway	0.123374	0.143166	7.96114	16.659	CREB1
188	Signaling by interleukins	0.127772	0.147482	7.66474	15.7703	PIK3R3
189	Signaling by EGFR in cancer	0.129963	0.148432	7.52462	15.354	CREB1
190	Epidermal growth factor receptor (EGFR) pathway	0.129963	0.148432	7.52462	15.354	CREB1
191	Fas signaling pathway	0.13433	0.152616	7.25914	14.5724	PIK3R3
192	G alpha s pathway	0.139758	0.157138	6.95238	13.6812	CREB1
193	Interleukin-1 regulation of extracellular matrix	0.139758	0.157138	6.95238	13.6812	SMAD1
194	Notch signaling pathway	0.14084	0.157538	6.8941	13.5133	INPP5K
195	Signaling by PDGF	0.141921	0.157932	6.83678	13.3487	CREB1
196	Signaling by FGFR in disease	0.148376	0.164274	6.51181	12.4246	CREB1
197	Adipogenesis	0.15372	0.168471	6.26357	11.7293	CREB1
198	Membrane trafficking	0.15372	0.168471	6.26357	11.7293	DAB2
199	NGF signaling via TRKA from the plasma membrane	0.156911	0.171104	6.12346	11.3411	CREB1
200	Interleukin-5 regulation of apoptosis	0.165364	0.17942	5.77855	10.3991	CREB1
201	Signaling by the B cell receptor (BCR)	0.172693	0.186105	5.50694	9.6715	CREB1
202	T cell receptor regulation of apoptosis	0.173241	0.186105	2.80315	4.91413	ACTR3;SMAD1
203	Adaptive immune system	0.174585	0.186625	2.7888	4.86742	CREB1;PIK3R3
204	Myometrial relaxation and contraction pathways	0.176854	0.188124	5.36282	9.29073	CREB1
205	Toll receptor cascades	0.180994	0.191589	5.226	8.93276	CREB1
206	Huntington's disease	0.206422	0.217444	4.50638	7.11031	CREB1
207	Transmission across chemical synapses	0.212411	0.222672	4.36199	6.75774	CREB1
208	Signaling by NGF	0.242669	0.253169	3.74148	5.29815	CREB1
209	Immune system signaling by interferons, interleukins, prolactin, and growth hormones	0.297202	0.308578	2.94146	3.569	PIK3R3
210	Neuronal system	0.299872	0.309867	2.90972	3.50447	CREB1
211	MAPK signaling pathway	0.326894	0.33619	2.61741	2.92658	CREB1
212	Innate immune system	0.331158	0.338968	2.5756	2.84646	CREB1
213	Immune system	0.356747	0.363446	1.65698	1.70789	CREB1;PIK3R3
214	TGF-beta regulation of extracellular matrix	0.511713	0.518887	1.43403	0.960785	ACTR3
215	Disease	0.575798	0.581154	1.19502	0.659651	CREB1
216	Interleukin-2 signaling pathway	0.661247	0.664308	0.94213	0.389691	PIK3R3
217	Signal transduction	0.730036	0.730036	0.775106	0.243896	CREB1

## Sheet: GO Biological Process 2023
	GO Biological Process 2023
Index	Term	P-value	Adjusted P-value	Odds Ratio	Combined Score	Genes
1	Arp2/3 Complex-Mediated Actin Nucleation (GO:0034314)	5.35037e-14	1.89938e-11	484.907	14818.3	ACTR3;ARPC2;ARPC3;ARPC1A;ARPC4;ARPC5
2	Actin Nucleation (GO:0045010)	1.98425e-13	2.96611e-11	370.737	10843.4	ACTR3;ARPC2;ARPC3;ARPC1A;ARPC4;ARPC5
3	Phosphatidylinositol Biosynthetic Process (GO:0006661)	2.50657e-13	2.96611e-11	103.974	3016.77	SYNJ1;INPP5J;PIK3R3;INPP5K;PIP5K1A;PIP5K1B;PIP5K1C;SYNJ2
4	Phosphatidylinositol Metabolic Process (GO:0046488)	1.00264e-12	8.89846e-11	138.326	3821.73	SYNJ1;INPP5J;INPP5K;PIP5K1A;PIP5K1B;PIP5K1C;SYNJ2
5	Glycerophospholipid Biosynthetic Process (GO:0046474)	4.877e-11	3.46267e-09	76.5226	1816.94	SYNJ1;INPP5J;INPP5K;PIP5K1A;PIP5K1B;PIP5K1C;SYNJ2
6	Phosphatidylinositol Dephosphorylation (GO:0046856)	3.4192e-09	2.02302e-07	316.873	6177.08	SYNJ1;INPP5J;INPP5K;SYNJ2
7	Phospholipid Dephosphorylation (GO:0046839)	5.08852e-08	2.58061e-06	146.147	2454.34	SYNJ1;INPP5J;INPP5K;SYNJ2
8	Positive Regulation Of Lamellipodium Assembly (GO:0010592)	3.00518e-06	0.000133355	136.057	1729.99	ACTR3;ACTR2;ARPC2
9	Regulation Of Phosphatidylinositol 3-Kinase Signaling (GO:0014066)	4.5113e-06	0.000177946	44.0509	542.22	MAZ;PIP5K1A;PIP5K1B;PIP5K1C
10	Positive Regulation Of Lamellipodium Organization (GO:1902745)	7.57738e-06	0.000244543	97.1445	1145.37	ACTR3;ACTR2;ARPC2
11	Presynaptic Endocytosis (GO:0140238)	7.57738e-06	0.000244543	97.1445	1145.37	SYNJ1;PIP5K1C;SYNJ2
12	Regulation Of Lamellipodium Assembly (GO:0010591)	9.18223e-06	0.000271641	90.6591	1051.49	ACTR3;ACTR2;ARPC2
13	Ruffle Assembly (GO:0097178)	1.49654e-05	0.00040867	578.899	6431.43	INPP5K;PIP5K1A
14	Synaptic Vesicle Endocytosis (GO:0048488)	1.6532e-05	0.000419204	73.4816	809.048	SYNJ1;PIP5K1C;SYNJ2
15	Synaptic Vesicle Recycling (GO:0036465)	2.2088e-05	0.000522748	66.2993	710.761	SYNJ1;PIP5K1C;SYNJ2
16	Endocytosis (GO:0006897)	8.36542e-05	0.00185608	20.3758	191.305	DAB2;PIP5K1A;PIP5K1C;PDLIM7
17	Positive Regulation Of Plasma Membrane Bounded Cell Projection Assembly (GO:0120034)	0.000176496	0.00351215	31.9091	275.765	ACTR3;ACTR2;ARPC2
18	Ruffle Organization (GO:0031529)	0.000178081	0.00351215	123.981	1070.37	INPP5K;PIP5K1A
19	Polyol Metabolic Process (GO:0019751)	0.00020167	0.00376805	115.71	984.563	SYNJ1;INPP5J
20	Establishment Of Vesicle Localization (GO:0051650)	0.000226706	0.00402402	108.473	910.289	SYNJ1;SYT11
21	Negative Regulation Of Peptidyl-Serine Phosphorylation (GO:0033137)	0.000253183	0.00428	102.087	845.423	INPP5J;INPP5K
22	Inositol Phosphate Metabolic Process (GO:0043647)	0.000341234	0.00543754	86.7609	692.607	SYNJ1;INPP5J
23	Plasma Membrane Bounded Cell Projection Assembly (GO:0120031)	0.000352291	0.00543754	13.8492	110.116	ACTR3;ACTR2;INPP5K;PIP5K1A
24	Negative Regulation Of Protein Localization To Membrane (GO:1905476)	0.000442145	0.00654006	75.4329	582.634	DAB2;INPP5K
25	Receptor-Mediated Endocytosis (GO:0006898)	0.000461738	0.00655668	22.7532	174.757	DAB2;PIP5K1C;PDLIM7
26	Regulation Of Protein Kinase B Signaling (GO:0051896)	0.000633926	0.00865553	20.3438	149.803	MAZ;INPP5K;PIK3R5
27	Membrane Organization (GO:0061024)	0.00114891	0.015106	16.4726	111.502	SYNJ1;PIP5K1C;SYNJ2
28	Synaptic Vesicle Exocytosis (GO:0016079)	0.00119382	0.015136	44.4504	299.178	SYT11;PIP5K1C
29	Positive Regulation Of Receptor-Mediated Endocytosis (GO:0048260)	0.00131265	0.015533	42.2778	280.543	DAB2;SGIP1
30	Learning (GO:0007612)	0.00131265	0.015533	42.2778	280.543	SYNJ1;SYT11
31	Phosphate-Containing Compound Metabolic Process (GO:0006796)	0.00151789	0.0173823	14.9126	96.7893	SYNJ1;INPP5J;INPP5K
32	Positive Regulation Of Transport (GO:0051050)	0.00177122	0.0196495	36.0996	228.73	DAB2;INPP5K
33	Regulated Exocytosis (GO:0045055)	0.00184211	0.0198166	35.3611	222.664	SYT11;PIP5K1C
34	Positive Regulation Of Cell Motility (GO:2000147)	0.00255824	0.026711	12.3584	73.7605	DAB2;MAZ;PIK3R3
35	Glycerophospholipid Metabolic Process (GO:0006650)	0.00270922	0.0274792	28.8623	170.608	SYNJ1;PIP5K1A
36	Regulation Of Endocytosis (GO:0030100)	0.00306375	0.030212	27.053	156.586	DAB2;SYT11
37	Phagocytosis (GO:0006909)	0.00334317	0.0320764	25.8378	147.297	PIP5K1A;PIP5K1C
38	Positive Regulation Of DNA-templated Transcription (GO:0045893)	0.00362485	0.0338637	4.78356	26.8833	ACTR3;ACTR2;DAB2;CREB1;MAZ;INPP5K
39	Regulation Of Protein Phosphorylation (GO:0001932)	0.00426363	0.0377268	10.2601	55.9957	DAB2;PIK3R3;INPP5K
40	Vesicle Fusion (GO:0006906)	0.00435718	0.0377268	22.4709	122.15	SYT11;ATP13A2
41	Positive Regulation Of Endocytosis (GO:0045807)	0.00435718	0.0377268	22.4709	122.15	DAB2;SGIP1
42	Positive Regulation Of Cell Migration (GO:0030335)	0.00458542	0.0387577	9.98952	53.7923	DAB2;MAZ;PIK3R3
43	Regulation Of Intracellular Signal Transduction (GO:1902531)	0.00585369	0.0434001	9.12848	46.9266	PIP5K1A;PIP5K1B;PIP5K1C
44	Positive Regulation Of Protein Kinase B Signaling (GO:0051897)	0.0059857	0.0434001	19.0005	97.2517	MAZ;PIK3R5
45	Regulation Of Peptidyl-Serine Phosphorylation (GO:0033135)	0.0059857	0.0434001	19.0005	97.2517	INPP5J;INPP5K
46	Negative Regulation Of Glycogen Biosynthetic Process (GO:0045719)	0.00623494	0.0434001	208.031	1056.3	INPP5K
47	Synaptic Vesicle Uncoating (GO:0016191)	0.00623494	0.0434001	208.031	1056.3	SYNJ1
48	Regulation Of Glycogen (Starch) Synthase Activity (GO:2000465)	0.00623494	0.0434001	208.031	1056.3	INPP5K
49	Negative Regulation Of Protein Targeting To Membrane (GO:0090315)	0.00623494	0.0434001	208.031	1056.3	INPP5K
50	Response To Manganese Ion (GO:0010042)	0.00623494	0.0434001	208.031	1056.3	ATP13A2
51	Positive Regulation Of Urine Volume (GO:0035810)	0.00623494	0.0434001	208.031	1056.3	INPP5K
52	Cellular Response To Insulin Stimulus (GO:0032869)	0.00675644	0.0461257	17.8198	89.0502	PIK3R3;INPP5K
53	Regulation Of Organelle Organization (GO:0033043)	0.00688907	0.0461438	17.6371	87.7942	SYT11;ATP13A2
54	Negative Regulation Of Glycogen Metabolic Process (GO:0070874)	0.00747745	0.0474017	166.417	814.753	INPP5K
55	Clathrin Coat Disassembly (GO:0072318)	0.00747745	0.0474017	166.417	814.753	SYNJ1
56	Negative Regulation Of Catecholamine Secretion (GO:0033604)	0.00747745	0.0474017	166.417	814.753	SYT11
57	Termination Of RNA Polymerase II Transcription (GO:0006369)	0.00871846	0.053363	138.674	657.634	MAZ
58	Negative Regulation Of Microglial Cell Activation (GO:1903979)	0.00871846	0.053363	138.674	657.634	SYT11
59	Regulation Of MAP Kinase Activity (GO:0043405)	0.00886901	0.0533644	15.4216	72.87	INPP5K;PIK3R5
60	Regulation Of Glucan Biosynthetic Process (GO:0010962)	0.00995799	0.0570175	118.857	547.858	INPP5K
61	Regulation Of Urine Volume (GO:0035809)	0.00995799	0.0570175	118.857	547.858	INPP5K
62	Autophagosome-Lysosome Fusion (GO:0061909)	0.00995799	0.0570175	118.857	547.858	ATP13A2
63	Positive Regulation Of Macromolecule Metabolic Process (GO:0010604)	0.0102188	0.0575821	7.40896	33.9592	MAZ;PIK3R3;ATP13A2
64	Glycerolipid Metabolic Process (GO:0046486)	0.011196	0.0596428	103.995	467.165	PIP5K1A
65	Adherens Junction Assembly (GO:0034333)	0.011196	0.0596428	103.995	467.165	PIP5K1C
66	Negative Regulation Of Transcription By Competitive Promoter Binding (GO:0010944)	0.011196	0.0596428	103.995	467.165	CREB1
67	Circulatory System Development (GO:0072359)	0.0117432	0.0596428	13.2742	58.9972	PDLIM5;PDLIM7
68	Cellular Response To Metal Ion (GO:0071248)	0.0122571	0.0596428	12.9729	57.102	SYT11;ATP13A2
69	Negative Regulation Of Dephosphorylation (GO:0035305)	0.0124326	0.0596428	92.4352	405.553	INPP5K
70	Synaptic Vesicle Transport (GO:0048489)	0.0124326	0.0596428	92.4352	405.553	SYNJ1
71	Cellular Response To Forskolin (GO:1904322)	0.0124326	0.0596428	92.4352	405.553	CREB1
72	Positive Regulation Of Non-Canonical Wnt Signaling Pathway (GO:2000052)	0.0124326	0.0596428	92.4352	405.553	DAB2
73	Response To Forskolin (GO:1904321)	0.0124326	0.0596428	92.4352	405.553	CREB1
74	Negative Regulation Of Transmembrane Transport (GO:0034763)	0.0124326	0.0596428	92.4352	405.553	INPP5K
75	Protein Localization To Plasma Membrane (GO:0072659)	0.0126051	0.0596642	12.7794	55.8926	INPP5K;PIP5K1A
76	Protein Localization To Cell Periphery (GO:1990778)	0.0134941	0.0600951	12.3199	53.0433	INPP5K;PIP5K1A
77	Negative Regulation Of Glucose Transmembrane Transport (GO:0010829)	0.0136677	0.0600951	83.1875	357.101	INPP5K
78	Regulation Of Glycogen Metabolic Process (GO:0070873)	0.0136677	0.0600951	83.1875	357.101	INPP5K
79	Regulation Of Lipid Kinase Activity (GO:0043550)	0.0136677	0.0600951	83.1875	357.101	PIK3R3
80	Positive Regulation Of Behavior (GO:0048520)	0.0136677	0.0600951	83.1875	357.101	SGIP1
81	Cellular Response To Oxygen-Containing Compound (GO:1901701)	0.0137118	0.0600951	6.6226	28.4076	CREB1;SYT11;INPP5K
82	Negative Regulation Of Protein Phosphorylation (GO:0001933)	0.0147833	0.0637342	11.7291	49.4293	INPP5J;INPP5K
83	Negative Regulation By Host Of Viral Transcription (GO:0043922)	0.0149012	0.0637342	75.6212	318.086	INPP5K
84	Cellular Response To Organic Cyclic Compound (GO:0071407)	0.0153516	0.0648789	11.4928	47.9999	CREB1;INPP5K
85	Synaptic Vesicle Localization (GO:0097479)	0.0161334	0.066597	69.316	286.058	SYNJ1
86	Negative Regulation Of Neuroinflammatory Response (GO:0150079)	0.0161334	0.066597	69.316	286.058	SYT11
87	Regulation Of Cell Migration (GO:0030334)	0.0163771	0.066826	6.18351	25.4258	DAB2;MAZ;PIK3R3
88	Calcium Ion-Regulated Exocytosis Of Neurotransmitter (GO:0048791)	0.017364	0.0670023	63.9808	259.337	SYT11
89	Regulation Of Feeding Behavior (GO:0060259)	0.017364	0.0670023	63.9808	259.337	SGIP1
90	Negative Regulation Of Peptidyl-Threonine Phosphorylation (GO:0010801)	0.017364	0.0670023	63.9808	259.337	INPP5K
91	Negative Regulation Of Single Stranded Viral RNA Replication Via Double Stranded DNA Intermediate (GO:0045869)	0.017364	0.0670023	63.9808	259.337	INPP5K
92	Regulation Of Microglial Cell Activation (GO:1903978)	0.017364	0.0670023	63.9808	259.337	SYT11
93	Regulation Of Clathrin-Dependent Endocytosis (GO:2000369)	0.0185931	0.0686085	59.4077	236.738	DAB2
94	Regulation Of Dephosphorylation (GO:0035303)	0.0185931	0.0686085	59.4077	236.738	INPP5K
95	Negative Regulation Of Macrophage Activation (GO:0043031)	0.0185931	0.0686085	59.4077	236.738	SYT11
96	Negative Regulation Of Phagocytosis (GO:0050765)	0.0185931	0.0686085	59.4077	236.738	SYT11
97	Brain Development (GO:0007420)	0.0187465	0.0686085	10.314	41.0161	SYNJ1;SYNJ2
98	Heart Development (GO:0007507)	0.0191651	0.0694246	10.1909	40.3016	PDLIM5;PDLIM7
99	DNA-templated Transcription Termination (GO:0006353)	0.0198208	0.0696672	55.4444	217.399	MAZ
100	Negative Regulation Of RNA Biosynthetic Process (GO:1902679)	0.0198208	0.0696672	55.4444	217.399	INPP5K
101	Negative Regulation Of Anoikis (GO:2000811)	0.0198208	0.0696672	55.4444	217.399	PIK3R3
102	Cell Migration Involved In Sprouting Angiogenesis (GO:0002042)	0.021047	0.0704876	51.9766	200.681	PIK3R3
103	Regulation Of Single Stranded Viral RNA Replication Via Double Stranded DNA Intermediate (GO:0045091)	0.021047	0.0704876	51.9766	200.681	INPP5K
104	Regulation Of Glucose Transmembrane Transport (GO:0010827)	0.021047	0.0704876	51.9766	200.681	INPP5K
105	Positive Regulation Of SMAD Protein Signal Transduction (GO:0060391)	0.021047	0.0704876	51.9766	200.681	DAB2
106	Negative Regulation Of Calcium Ion Transport (GO:0051926)	0.021047	0.0704876	51.9766	200.681	INPP5K
107	Positive Regulation Of Gene Expression (GO:0010628)	0.0213517	0.0708399	5.57404	21.4412	MAZ;PIK3R3;ATP13A2
108	Negative Regulation Of Apoptotic Process (GO:0043066)	0.021585	0.0709507	5.5502	21.2892	DAB2;MAZ;PIK3R3
109	Negative Regulation Of Monoatomic Ion Transport (GO:0043271)	0.0222717	0.0718769	48.9167	186.1	INPP5K
110	Vesicle-Mediated Transport In Synapse (GO:0099003)	0.0222717	0.0718769	48.9167	186.1	PIP5K1C
111	Regulation Of Early Endosome To Late Endosome Transport (GO:2000641)	0.023495	0.0747535	46.1968	173.283	DAB2
112	Protein Localization To Membrane (GO:0072657)	0.0237948	0.0747535	9.05492	33.8499	INPP5K;PIP5K1A
113	Transcription By RNA Polymerase II (GO:0006366)	0.0237948	0.0747535	9.05492	33.8499	CREB1;MAZ
114	Negative Regulation Of Phosphate Metabolic Process (GO:0045936)	0.0247168	0.0756419	43.7632	161.936	INPP5K
115	Negative Regulation Of Protein Localization To Cell Periphery (GO:1904376)	0.0247168	0.0756419	43.7632	161.936	DAB2
116	Negative Regulation Of Protein Localization To Plasma Membrane (GO:1903077)	0.0247168	0.0756419	43.7632	161.936	DAB2
117	Focal Adhesion Assembly (GO:0048041)	0.0259371	0.0773754	41.5729	151.828	PIP5K1A
118	Plasma Membrane Repair (GO:0001778)	0.0259371	0.0773754	41.5729	151.828	SYT11
119	Regulation Of Anoikis (GO:2000209)	0.0259371	0.0773754	41.5729	151.828	PIK3R3
120	Positive Regulation Of Intracellular Signal Transduction (GO:1902533)	0.0269431	0.0783694	5.08177	18.3656	DAB2;MAZ;PIK3R5
121	Regulation Of Dopamine Secretion (GO:0014059)	0.0271559	0.0783694	39.5913	142.772	SYT11
122	Blood Vessel Endothelial Cell Migration (GO:0043534)	0.0271559	0.0783694	39.5913	142.772	PIK3R3
123	Positive Regulation Of Transcription By RNA Polymerase II (GO:0045944)	0.0277132	0.0783694	3.88314	13.9244	ACTR3;ACTR2;DAB2;CREB1
124	Regulation Of Cell Junction Assembly (GO:1901888)	0.0283733	0.0783694	37.7898	134.619	PDLIM5
125	Protein Kinase B Signaling (GO:0043491)	0.0295893	0.0783694	36.1449	127.243	PIK3R3
126	Positive Regulation Of Lipid Metabolic Process (GO:0045834)	0.0295893	0.0783694	36.1449	127.243	CREB1
127	Response To Purine-Containing Compound (GO:0014074)	0.0295893	0.0783694	36.1449	127.243	CREB1
128	Positive Regulation Of Cellular Response To Transforming Growth Factor Beta Stimulus (GO:1903846)	0.0295893	0.0783694	36.1449	127.243	DAB2
129	Positive Regulation Of Transforming Growth Factor Beta Receptor Signaling Pathway (GO:0030511)	0.0295893	0.0783694	36.1449	127.243	DAB2
130	Negative Regulation Of Intracellular Protein Transport (GO:0090317)	0.0308037	0.0783694	34.6372	120.541	INPP5K
131	Regulation Of Synapse Organization (GO:0050807)	0.0308037	0.0783694	34.6372	120.541	PDLIM5
132	Regulation Of Glycogen Biosynthetic Process (GO:0005979)	0.0308037	0.0783694	34.6372	120.541	INPP5K
133	Negative Regulation Of Stress Fiber Assembly (GO:0051497)	0.0308037	0.0783694	34.6372	120.541	INPP5K
134	Regulation Of Postsynapse Organization (GO:0099175)	0.0308037	0.0783694	34.6372	120.541	PDLIM5
135	Positive Regulation Of Nucleic Acid-Templated Transcription (GO:1903508)	0.0313567	0.0783694	4.78036	16.5512	CREB1;MAZ;INPP5K
136	Positive Regulation Of Protein Modification Process (GO:0031401)	0.0318951	0.0783694	7.70209	26.536	DAB2;PIK3R3
137	Calcium-Ion Regulated Exocytosis (GO:0017156)	0.0320167	0.0783694	33.25	114.43	SYT11
138	Organelle Membrane Fusion (GO:0090174)	0.0320167	0.0783694	33.25	114.43	SYT11
139	Cardiac Muscle Cell Development (GO:0055013)	0.0320167	0.0783694	33.25	114.43	PDLIM5
140	Negative Regulation Of Insulin Receptor Signaling Pathway (GO:0046627)	0.0320167	0.0783694	33.25	114.43	INPP5K
141	cAMP-mediated Signaling (GO:0019933)	0.0320167	0.0783694	33.25	114.43	CREB1
142	Cilium Organization (GO:0044782)	0.032679	0.0783694	7.59869	25.9953	ACTR3;ACTR2
143	Cellular Response To Epidermal Growth Factor Stimulus (GO:0071364)	0.0332283	0.0783694	31.9696	108.836	INPP5K
144	Phospholipid Biosynthetic Process (GO:0008654)	0.0332283	0.0783694	31.9696	108.836	PIP5K1A
145	Clathrin-Dependent Endocytosis (GO:0072583)	0.0332283	0.0783694	31.9696	108.836	PIP5K1C
146	Regulation Of SMAD Protein Signal Transduction (GO:0060390)	0.0332283	0.0783694	31.9696	108.836	DAB2
147	Regulation Of Catecholamine Secretion (GO:0050433)	0.0332283	0.0783694	31.9696	108.836	SYT11
148	Regulation Of Peptidase Activity (GO:0052547)	0.0332283	0.0783694	31.9696	108.836	ATP13A2
149	Negative Regulation Of Cellular Response To Insulin Stimulus (GO:1900077)	0.0332283	0.0783694	31.9696	108.836	INPP5K
150	Positive Regulation Of Phosphorylation (GO:0042327)	0.0334705	0.0783694	7.49801	25.4714	DAB2;PIK3R3
151	Regulation Of Protein Targeting To Membrane (GO:0090313)	0.0344384	0.0783694	30.784	103.698	INPP5K
152	Regulation Of Protein Transport (GO:0051223)	0.0344384	0.0783694	30.784	103.698	ATP13A2
153	Cell-Substrate Junction Assembly (GO:0007044)	0.0344384	0.0783694	30.784	103.698	PIP5K1A
154	Regulation Of Lipid Biosynthetic Process (GO:0046890)	0.0344384	0.0783694	30.784	103.698	CREB1
155	Negative Regulation Of Actin Filament Bundle Assembly (GO:0032232)	0.0344384	0.0783694	30.784	103.698	INPP5K
156	Regulation Of Calcium Ion-Dependent Exocytosis (GO:0017158)	0.0344384	0.0783694	30.784	103.698	SYT11
157	Cilium Assembly (GO:0060271)	0.0367118	0.0817703	7.12033	23.5303	ACTR3;ACTR2
158	Negative Regulation Of DNA-templated Transcription (GO:0045892)	0.0367469	0.0817703	3.53603	11.682	DAB2;CREB1;MAZ;INPP5K
159	Regulation Of Dendritic Spine Morphogenesis (GO:0061001)	0.0368542	0.0817703	28.658	94.5941	PDLIM5
160	Response To Epidermal Growth Factor (GO:0070849)	0.0368542	0.0817703	28.658	94.5941	INPP5K
161	Negative Regulation Of Intracellular Steroid Hormone Receptor Signaling Pathway (GO:0033144)	0.03806	0.083403	27.7014	90.5446	DAB2
162	Cellular Response To cAMP (GO:0071320)	0.03806	0.083403	27.7014	90.5446	INPP5K
163	Phosphatidylinositol 3-Kinase Signaling (GO:0014065)	0.0392642	0.0855141	26.8065	86.7843	PIK3R5
164	Negative Regulation Of Endocytosis (GO:0045806)	0.0404671	0.0875964	25.9674	83.2845	SYT11
165	Organophosphate Biosynthetic Process (GO:0090407)	0.0416685	0.0880495	25.1793	80.0201	PIP5K1A
166	Negative Regulation Of Interleukin-6 Production (GO:0032715)	0.0416685	0.0880495	25.1793	80.0201	SYT11
167	Positive Regulation Of Organelle Organization (GO:0010638)	0.0416685	0.0880495	25.1793	80.0201	SYNJ1
168	Regulation Of Phosphatidylinositol 3-Kinase Activity (GO:0043551)	0.0416685	0.0880495	25.1793	80.0201	PIK3R3
169	Regulation Of Regulated Secretory Pathway (GO:1903305)	0.0428684	0.0893929	24.4375	76.9688	SYT11
170	Adherens Junction Organization (GO:0034332)	0.0428684	0.0893929	24.4375	76.9688	PIP5K1C
171	Negative Regulation Of Signal Transduction (GO:0009968)	0.0435419	0.0893929	6.4676	20.2697	MAZ;INPP5K
172	Negative Regulation Of Protein Kinase B Signaling (GO:0051898)	0.0440669	0.0893929	23.7381	74.1114	INPP5K
173	Regulation Of Intracellular Protein Transport (GO:0033157)	0.0440669	0.0893929	23.7381	74.1114	ATP13A2
174	Positive Regulation Of Double-Strand Break Repair Via Homologous Recombination (GO:1905168)	0.0440669	0.0893929	23.7381	74.1114	ACTR2
175	Regulation Of Peptidyl-Threonine Phosphorylation (GO:0010799)	0.0440669	0.0893929	23.7381	74.1114	INPP5K
176	Synaptic Vesicle Cycle (GO:0099504)	0.045264	0.0901266	23.0775	71.4306	PIP5K1C
177	Negative Regulation Of Transferase Activity (GO:0051348)	0.045264	0.0901266	23.0775	71.4306	INPP5K
178	Positive Regulation Of Exocytosis (GO:0045921)	0.045264	0.0901266	23.0775	71.4306	ATP13A2
179	mRNA Transcription By RNA Polymerase II (GO:0042789)	0.0464596	0.0901266	22.4527	68.9112	CREB1
180	Regulation Of Intracellular Transport (GO:0032386)	0.0464596	0.0901266	22.4527	68.9112	ATP13A2
181	Response To cAMP (GO:0051591)	0.0464596	0.0901266	22.4527	68.9112	INPP5K
182	Regulation Of Neurotransmitter Secretion (GO:0046928)	0.0464596	0.0901266	22.4527	68.9112	SYT11
183	Signal Release From Synapse (GO:0099643)	0.0464596	0.0901266	22.4527	68.9112	PIP5K1C
184	Regulation Of Receptor-Mediated Endocytosis (GO:0048259)	0.0476538	0.0909522	21.8607	66.5396	SGIP1
185	Positive Regulation Of Lipid Biosynthetic Process (GO:0046889)	0.0476538	0.0909522	21.8607	66.5396	CREB1
186	Negative Regulation Of Transport (GO:0051051)	0.0476538	0.0909522	21.8607	66.5396	SYT11
187	Central Nervous System Development (GO:0007417)	0.0483404	0.091266	6.09438	18.4629	SYNJ1;SYNJ2
188	Positive Regulation Of Cell Differentiation (GO:0045597)	0.0483404	0.091266	6.09438	18.4629	DAB2;CREB1
189	Negative Regulation Of Secretion By Cell (GO:1903531)	0.0488466	0.091266	21.2991	64.3036	SYT11
190	Cyclic-Nucleotide-Mediated Signaling (GO:0019935)	0.0488466	0.091266	21.2991	64.3036	CREB1
191	Protein Localization To Lysosome (GO:0061462)	0.0500379	0.092518	20.7656	62.1925	ATP13A2
192	Cellular Response To Retinoic Acid (GO:0071300)	0.0500379	0.092518	20.7656	62.1925	CREB1
193	Modulation By Host Of Symbiont Process (GO:0051851)	0.0512278	0.0937416	20.2581	60.1965	INPP5K
194	Keratinocyte Differentiation (GO:0030216)	0.0512278	0.0937416	20.2581	60.1965	PIP5K1A
195	mRNA Transcription (GO:0009299)	0.0524162	0.0944557	19.7748	58.3068	CREB1
196	Neurotransmitter Secretion (GO:0007269)	0.0524162	0.0944557	19.7748	58.3068	PIP5K1C
197	Regulation Of Cellular Component Size (GO:0032535)	0.0524162	0.0944557	19.7748	58.3068	ATP13A2
198	Phosphatidylinositol Phosphate Biosynthetic Process (GO:0046854)	0.0536033	0.0946725	19.314	56.5154	PIK3R3
199	Cellular Response To Ketone (GO:1901655)	0.0536033	0.0946725	19.314	56.5154	CREB1
200	Regulation Of Insulin Receptor Signaling Pathway (GO:0046626)	0.0536033	0.0946725	19.314	56.5154	INPP5K
201	Positive Regulation Of Biosynthetic Process (GO:0009891)	0.0536033	0.0946725	19.314	56.5154	CREB1
202	Regulation Of Apoptotic Signaling Pathway (GO:2001233)	0.0547889	0.0962874	18.8741	54.8153	MAZ
203	Vacuolar Transport (GO:0007034)	0.0559731	0.0974041	18.4537	53.1999	ATP13A2
204	T Cell Differentiation (GO:0030217)	0.0559731	0.0974041	18.4537	53.1999	PIK3R3
205	Negative Regulation Of Tumor Necrosis Factor Production (GO:0032720)	0.0571558	0.0975496	18.0516	51.6633	SYT11
206	Insulin Receptor Signaling Pathway (GO:0008286)	0.0571558	0.0975496	18.0516	51.6633	PIK3R3
207	Response To Organonitrogen Compound (GO:0010243)	0.0571558	0.0975496	18.0516	51.6633	CREB1
208	Positive Regulation Of Epithelial To Mesenchymal Transition (GO:0010718)	0.0571558	0.0975496	18.0516	51.6633	DAB2
209	Positive Regulation Of Pathway-Restricted SMAD Protein Phosphorylation (GO:0010862)	0.059517	0.100612	17.2977	48.8055	DAB2
210	Negative Regulation Of Tumor Necrosis Factor Superfamily Cytokine Production (GO:1903556)	0.059517	0.100612	17.2977	48.8055	SYT11
211	Cell Chemotaxis (GO:0060326)	0.0606955	0.100857	16.9439	47.4748	PIP5K1A
212	Intracellular Iron Ion Homeostasis (GO:0006879)	0.0606955	0.100857	16.9439	47.4748	ATP13A2
213	Positive Regulation Of Fat Cell Differentiation (GO:0045600)	0.0606955	0.100857	16.9439	47.4748	CREB1
214	Organelle Assembly (GO:0070925)	0.060798	0.100857	5.34103	14.9559	ACTR3;ACTR2
215	Regulation Of Synapse Assembly (GO:0051963)	0.0618726	0.10122	16.6042	46.204	PDLIM5
216	Positive Regulation Of DNA Recombination (GO:0045911)	0.0618726	0.10122	16.6042	46.204	ACTR2
217	Negative Regulation Of MAP Kinase Activity (GO:0043407)	0.0618726	0.10122	16.6042	46.204	INPP5K
218	Sprouting Angiogenesis (GO:0002040)	0.0630483	0.101737	16.2778	44.9894	PIK3R3
219	Regulation Of Protein Localization To Nucleus (GO:1900180)	0.0630483	0.101737	16.2778	44.9894	ATP13A2
220	Neurotransmitter Transport (GO:0006836)	0.0630483	0.101737	16.2778	44.9894	SYNJ1
221	Cellular Response To Alcohol (GO:0097306)	0.0642225	0.102238	15.9639	43.8274	CREB1
222	Actin Cytoskeleton Reorganization (GO:0031532)	0.0642225	0.102238	15.9639	43.8274	PIP5K1A
223	Negative Regulation Of Viral Genome Replication (GO:0045071)	0.0642225	0.102238	15.9639	43.8274	INPP5K
224	Epidermal Cell Differentiation (GO:0009913)	0.0653953	0.10364	15.6619	42.7149	PIP5K1A
225	Response To Peptide Hormone (GO:0043434)	0.0665667	0.105028	15.3711	41.6489	CREB1
226	Regulation Of Calcium Ion Transport (GO:0051924)	0.0689053	0.108155	14.8207	39.6457	INPP5K
227	Memory (GO:0007613)	0.0700725	0.108155	14.5599	38.7036	SYT11
228	Response To Organic Cyclic Compound (GO:0014070)	0.0700725	0.108155	14.5599	38.7036	CREB1
229	Regulation Of Neuron Death (GO:1901214)	0.0700725	0.108155	14.5599	38.7036	ATP13A2
230	Regulation Of Phagocytosis (GO:0050764)	0.0700725	0.108155	14.5599	38.7036	SYT11
231	DNA-templated Transcription Initiation (GO:0006352)	0.0712383	0.109479	14.3082	37.7983	MAZ
232	Response To Retinoic Acid (GO:0032526)	0.0724027	0.110789	14.065	36.9277	CREB1
233	Autophagosome Organization (GO:1905037)	0.0735657	0.111606	13.8299	36.0901	ATP13A2
234	Regulation Of Pathway-Restricted SMAD Protein Phosphorylation (GO:0060393)	0.0735657	0.111606	13.8299	36.0901	DAB2
235	Negative Regulation Of Kinase Activity (GO:0033673)	0.0747273	0.112408	13.6025	35.2836	INPP5K
236	Phosphatidylinositol-Mediated Signaling (GO:0048015)	0.0747273	0.112408	13.6025	35.2836	PIK3R5
237	Negative Regulation Of Cell Death (GO:0060548)	0.0770463	0.115407	13.1693	33.7575	ATP13A2
238	Positive Regulation Of Protein Phosphorylation (GO:0001934)	0.0800092	0.119341	4.54493	11.4787	DAB2;PIK3R3
239	B Cell Differentiation (GO:0030183)	0.0816675	0.120387	12.3806	31.0146	PIK3R3
240	Skin Development (GO:0043588)	0.0816675	0.120387	12.3806	31.0146	PIP5K1A
241	Regulation Of Endopeptidase Activity (GO:0052548)	0.0828193	0.120387	12.1979	30.3862	ATP13A2
242	Cellular Response To Calcium Ion (GO:0071277)	0.0828193	0.120387	12.1979	30.3862	SYT11
243	Phospholipid Metabolic Process (GO:0006644)	0.0828193	0.120387	12.1979	30.3862	PIP5K1A
244	Positive Regulation Of Phosphatidylinositol 3-Kinase Signaling (GO:0014068)	0.0828193	0.120387	12.1979	30.3862	MAZ
245	Positive Regulation Of Multicellular Organismal Process (GO:0051240)	0.0836872	0.120387	4.42462	10.976	DAB2;INPP5K
246	Positive Regulation Of Protein Transport (GO:0051222)	0.0839697	0.120387	12.0205	29.7784	ATP13A2
247	Neutrophil Chemotaxis (GO:0030593)	0.0839697	0.120387	12.0205	29.7784	PIP5K1C
248	Regulation Of Double-Strand Break Repair Via Homologous Recombination (GO:0010569)	0.0851188	0.120387	11.8482	29.1905	ACTR2
249	Cell-Cell Junction Assembly (GO:0007043)	0.0851188	0.120387	11.8482	29.1905	PIP5K1C
250	Negative Regulation Of Protein Binding (GO:0032091)	0.0851188	0.120387	11.8482	29.1905	DAB2
251	Lipid Biosynthetic Process (GO:0008610)	0.0851188	0.120387	11.8482	29.1905	PIP5K1A
252	Plasma Membrane Organization (GO:0007009)	0.0862665	0.121526	11.6808	28.6215	SYT11
253	Granulocyte Chemotaxis (GO:0071621)	0.0874128	0.122171	11.5179	28.0705	PIP5K1C
254	Positive Regulation Of Secretion By Cell (GO:1903532)	0.0874128	0.122171	11.5179	28.0705	ATP13A2
255	Regulation Of Fat Cell Differentiation (GO:0045598)	0.0897012	0.123906	11.2055	27.0195	CREB1
256	Regulation Of Stress Fiber Assembly (GO:0051492)	0.0897012	0.123906	11.2055	27.0195	INPP5K
257	Negative Regulation Of Phosphorylation (GO:0042326)	0.0897012	0.123906	11.2055	27.0195	INPP5K
258	Transcription Initiation At RNA Polymerase II Promoter (GO:0006367)	0.0908434	0.124515	11.0556	26.5181	MAZ
259	Positive Regulation Of Protein Secretion (GO:0050714)	0.0908434	0.124515	11.0556	26.5181	ATP13A2
260	Monoatomic Cation Homeostasis (GO:0055080)	0.0919841	0.125113	10.9095	26.0317	ATP13A2
261	Neutrophil Migration (GO:1990266)	0.0919841	0.125113	10.9095	26.0317	PIP5K1C
262	Negative Regulation Of Protein Modification Process (GO:0031400)	0.0931235	0.126179	10.7673	25.5598	INPP5K
263	Response To Insulin (GO:0032868)	0.0942616	0.126753	10.6287	25.1017	INPP5K
264	Negative Regulation Of Cellular Component Organization (GO:0051129)	0.0942616	0.126753	10.6287	25.1017	SYT11
265	Regulation Of Protein Localization To Plasma Membrane (GO:1903076)	0.0953982	0.12684	10.4937	24.6569	DAB2
266	Negative Regulation Of Protein Serine/Threonine Kinase Activity (GO:0071901)	0.0953982	0.12684	10.4937	24.6569	INPP5K
267	Wound Healing (GO:0042060)	0.0953982	0.12684	10.4937	24.6569	SYT11
268	Cellular Response To Organic Substance (GO:0071310)	0.0976675	0.128892	10.2335	23.8051	INPP5K
269	Negative Regulation Of Apoptotic Signaling Pathway (GO:2001234)	0.0976675	0.128892	10.2335	23.8051	MAZ
270	Regulation Of Epithelial To Mesenchymal Transition (GO:0010717)	0.0988	0.128949	10.1082	23.3971	DAB2
271	Positive Regulation Of Proteasomal Ubiquitin-Dependent Protein Catabolic Process (GO:0032436)	0.0988	0.128949	10.1082	23.3971	DAB2
272	Positive Regulation Of Ubiquitin-Dependent Protein Catabolic Process (GO:2000060)	0.0988	0.128949	10.1082	23.3971	DAB2
273	Positive Regulation Of Double-Strand Break Repair (GO:2000781)	0.0999312	0.129947	9.98594	23.0004	ACTR2
274	Positive Regulation Of Protein Localization (GO:1903829)	0.101061	0.130461	9.86657	22.6145	SYT11
275	Integrin-Mediated Signaling Pathway (GO:0007229)	0.101061	0.130461	9.86657	22.6145	DAB2
276	Negative Regulation Of Binding (GO:0051100)	0.10219	0.131287	9.75	22.239	DAB2
277	Regulation Of Transcription By RNA Polymerase II (GO:0006357)	0.102441	0.131287	2.21849	5.05475	ACTR3;ACTR2;DAB2;CREB1;MAZ
278	Glucose Homeostasis (GO:0042593)	0.103317	0.131933	9.63614	21.8736	INPP5K
279	Regulation Of Double-Strand Break Repair (GO:2000779)	0.104442	0.131947	9.5249	21.5179	ACTR2
280	Negative Regulation Of Neuron Death (GO:1901215)	0.104442	0.131947	9.5249	21.5179	ATP13A2
281	Negative Regulation Of Protein Kinase Activity (GO:0006469)	0.104442	0.131947	9.5249	21.5179	INPP5K
282	Cellular Response To Chemical Stress (GO:0062197)	0.105567	0.132425	9.41619	21.1715	ATP13A2
283	Cellular Response To Peptide Hormone Stimulus (GO:0071375)	0.105567	0.132425	9.41619	21.1715	INPP5K
284	Positive Regulation Of Proteasomal Protein Catabolic Process (GO:1901800)	0.10669	0.133362	9.30993	20.834	DAB2
285	Lymphocyte Differentiation (GO:0030098)	0.107811	0.133822	9.20602	20.5052	PIK3R3
286	Positive Regulation Of MAP Kinase Activity (GO:0043406)	0.107811	0.133822	9.20602	20.5052	PIK3R5
287	B Cell Activation (GO:0042113)	0.108932	0.134741	9.1044	20.1847	PIK3R3
288	Positive Regulation Of Cellular Component Biogenesis (GO:0044089)	0.110051	0.135653	9.00498	19.8723	ATP13A2
289	Cellular Response To Hormone Stimulus (GO:0032870)	0.111168	0.136085	8.90771	19.5676	INPP5K
290	Vesicle Organization (GO:0016050)	0.111168	0.136085	8.90771	19.5676	SYT11
291	Positive Regulation Of Transmembrane Receptor Protein Serine/Threonine Kinase Signaling Pathway (GO:0090100)	0.112285	0.13698	8.8125	19.2704	DAB2
292	Regulation Of Macroautophagy (GO:0016241)	0.1134	0.137866	8.7193	18.9805	ATP13A2
293	Regulation Of Protein Localization (GO:0032880)	0.114513	0.138745	8.62804	18.6975	ATP13A2
294	Negative Regulation Of Macromolecule Biosynthetic Process (GO:0010558)	0.115625	0.139616	8.53866	18.4213	INPP5K
295	Calcium Ion Homeostasis (GO:0055074)	0.120061	0.143507	8.19884	17.3795	ATP13A2
296	Regulation Of Protein Secretion (GO:0050708)	0.120061	0.143507	8.19884	17.3795	ATP13A2
297	Activation Of GTPase Activity (GO:0090630)	0.120061	0.143507	8.19884	17.3795	PIP5K1A
298	Macroautophagy (GO:0016236)	0.122271	0.145025	8.03883	16.8937	ATP13A2
299	Lysosomal Transport (GO:0007041)	0.123374	0.145025	7.96114	16.659	ATP13A2
300	Cellular Response To Organonitrogen Compound (GO:0071417)	0.123374	0.145025	7.96114	16.659	INPP5K
301	Negative Regulation Of MAPK Cascade (GO:0043409)	0.123374	0.145025	7.96114	16.659	INPP5K
302	Regulation Of Neuron Apoptotic Process (GO:0043523)	0.123374	0.145025	7.96114	16.659	ATP13A2
303	Response To Calcium Ion (GO:0051592)	0.124475	0.145837	7.88492	16.4294	SYT11
304	Response To Tumor Necrosis Factor (GO:0034612)	0.126674	0.147749	7.73676	15.9852	INPP5K
305	Regulation Of Proteasomal Ubiquitin-Dependent Protein Catabolic Process (GO:0032434)	0.127772	0.147749	7.66474	15.7703	DAB2
306	Cell-Matrix Adhesion (GO:0007160)	0.127772	0.147749	7.66474	15.7703	PIP5K1A
307	Cellular Response To Salt (GO:1902075)	0.127772	0.147749	7.66474	15.7703	SYT11
308	Protein Phosphorylation (GO:0006468)	0.128489	0.148096	3.40091	6.97836	CREB1;ATP13A2
309	Regulation Of Transforming Growth Factor Beta Receptor Signaling Pathway (GO:0017015)	0.129963	0.148829	7.52462	15.354	DAB2
310	T Cell Activation (GO:0042110)	0.129963	0.148829	7.52462	15.354	PIK3R3
311	Positive Regulation Of Cellular Component Organization (GO:0051130)	0.132149	0.150846	7.38951	14.9551	DAB2
312	Regulation Of Interleukin-6 Production (GO:0032675)	0.13324	0.151119	7.32375	14.7618	SYT11
313	Negative Regulation Of Canonical Wnt Signaling Pathway (GO:0090090)	0.13324	0.151119	7.32375	14.7618	DAB2
314	Cellular Response To Oxidative Stress (GO:0034599)	0.136505	0.153839	7.13326	14.2051	ATP13A2
315	Positive Regulation Of Protein Serine/Threonine Kinase Activity (GO:0071902)	0.136505	0.153839	7.13326	14.2051	PIK3R5
316	Regulation Of Protein Binding (GO:0043393)	0.137591	0.154572	7.07194	14.027	DAB2
317	Regulation Of Protein Kinase Activity (GO:0045859)	0.138675	0.15481	7.01165	13.8524	INPP5K
318	Cellular Response To Tumor Necrosis Factor (GO:0071356)	0.138675	0.15481	7.01165	13.8524	INPP5K
319	Regulation Of Protein Catabolic Process (GO:0042176)	0.141921	0.157937	6.83678	13.3487	ATP13A2
320	Regulation Of Tumor Necrosis Factor Production (GO:0032680)	0.147304	0.162906	6.56382	12.5714	SYT11
321	Regulation Of Anatomical Structure Morphogenesis (GO:0022603)	0.147304	0.162906	6.56382	12.5714	PDLIM5
322	Epithelial Cell Differentiation (GO:0030855)	0.152654	0.168299	6.3117	11.8634	DAB2
323	Intracellular Calcium Ion Homeostasis (GO:0006874)	0.160091	0.175951	5.98943	10.9727	ATP13A2
324	Negative Regulation Of Wnt Signaling Pathway (GO:0030178)	0.161148	0.176566	5.94604	10.8541	DAB2
325	Regulation Of Gene Expression (GO:0010468)	0.164211	0.179369	2.287	4.13171	MAZ;PIK3R3;ATP13A2
326	Actin Filament Organization (GO:0007015)	0.165364	0.180074	5.77855	10.3991	ARPC4
327	Dephosphorylation (GO:0016311)	0.168513	0.182942	5.65896	10.0772	INPP5K
328	Cellular Response To Growth Factor Stimulus (GO:0071363)	0.176854	0.191412	5.36282	9.29073	INPP5K
329	Protein Autophosphorylation (GO:0046777)	0.184086	0.198634	5.12785	8.67812	ATP13A2
330	Regulation Of Cytokine Production (GO:0001817)	0.189215	0.203549	4.97214	8.27797	SYT11
331	Regulation Of Neuron Projection Development (GO:0010975)	0.196343	0.210579	4.76927	7.76385	PDLIM5
332	Negative Regulation Of Cytokine Production (GO:0001818)	0.200389	0.214272	4.66055	7.4918	SYT11
333	Intracellular Monoatomic Cation Homeostasis (GO:0030003)	0.212411	0.226444	4.36199	6.75774	ATP13A2
334	Regulation Of Apoptotic Process (GO:0042981)	0.219798	0.233618	2.38382	3.61159	DAB2;ATP13A2
335	Regulation Of Canonical Wnt Signaling Pathway (GO:0060828)	0.229145	0.242825	3.99858	5.89152	DAB2
336	Protein Stabilization (GO:0050821)	0.230118	0.243131	3.97907	5.84589	CREB1
337	Negative Regulation Of Transcription By RNA Polymerase II (GO:0000122)	0.24683	0.260014	2.19551	3.07164	DAB2;MAZ
338	Cellular Response To Lipid (GO:0071396)	0.249345	0.261886	3.62482	5.03457	CREB1
339	Negative Regulation Of Intracellular Signal Transduction (GO:1902532)	0.252189	0.263315	3.57699	4.92758	INPP5K
340	Negative Regulation Of Multicellular Organismal Process (GO:0051241)	0.252189	0.263315	3.57699	4.92758	SYT11
341	Positive Regulation Of GTPase Activity (GO:0043547)	0.255023	0.265493	3.5304	4.82395	PIP5K1A
342	Regulation Of Autophagy (GO:0010506)	0.261595	0.271538	3.42622	4.59442	ATP13A2
343	Transmembrane Receptor Protein Tyrosine Kinase Signaling Pathway (GO:0007169)	0.300759	0.311281	2.89929	3.48334	PIK3R3
344	Cellular Response To Cytokine Stimulus (GO:0071345)	0.321743	0.332032	2.66938	3.02708	INPP5K
345	Positive Regulation Of MAPK Cascade (GO:0043410)	0.323464	0.33284	2.65183	2.99304	PIK3R5
346	Negative Regulation Of Gene Expression (GO:0010629)	0.345461	0.354447	2.44279	2.59638	SYT11
347	Negative Regulation Of Programmed Cell Death (GO:0043069)	0.381919	0.390724	2.14857	2.0681	DAB2
348	Vesicle-Mediated Transport (GO:0016192)	0.405132	0.413281	1.98831	1.79652	SYT11
349	Phosphorylation (GO:0016310)	0.418656	0.425854	1.90294	1.6569	CREB1
350	Regulation Of DNA-templated Transcription (GO:0006355)	0.436242	0.442474	1.28305	1.06437	CREB1;MAZ;INPP5K
351	Negative Regulation Of Nucleic Acid-Templated Transcription (GO:1903507)	0.43839	0.443386	1.78755	1.47409	INPP5K
352	Positive Regulation Of Cell Population Proliferation (GO:0008284)	0.45748	0.461379	1.68508	1.31777	MAZ
353	Positive Regulation Of Cellular Process (GO:0048522)	0.529617	0.532617	1.36186	0.865601	MAZ
354	Protein Modification Process (GO:0036211)	0.595654	0.597336	1.13058	0.585746	CREB1
355	Regulation Of Cell Population Proliferation (GO:0042127)	0.623529	0.623529	1.0463	0.494229	MAZ

## Sheet: GO Molecular Function 2023
	GO Molecular Function 2023
Index	Term	P-value	Adjusted P-value	Odds Ratio	Combined Score	Genes
1	Phosphatidylinositol-4,5-Bisphosphate 5-Phosphatase Activity (GO:0004439)	6.62478e-11	3.90862e-09	1268.06	29720.4	SYNJ1;INPP5J;INPP5K;SYNJ2
2	Phosphatidylinositol-4,5-Bisphosphate Phosphatase Activity (GO:0106019)	2.38098e-10	7.02389e-09	760.762	16857.2	SYNJ1;INPP5J;INPP5K;SYNJ2
	Phosphatidylinositol Phosphate 5-Phosphatase Activity (GO:0034595)	6.22555e-10	1.22436e-08	543.347	11517.4	SYNJ1;INPP5J;INPP5K;SYNJ2
	1-Phosphatidylinositol-4-Phosphate 5-Kinase Activity (GO:0016308)	3.4415e-08	5.07621e-07	907.818	15600.7	PIP5K1A;PIP5K1B;PIP5K1C
	Phosphatidylinositol Bisphosphate Kinase Activity (GO:0052813)	9.62046e-08	1.13521e-06	544.636	8799.57	PIP5K1A;PIP5K1B;PIP5K1C
	Inositol Trisphosphate Phosphatase Activity (GO:0046030)	2.05815e-07	2.02385e-06	388.987	5988.96	SYNJ1;INPP5J;INPP5K
	Phosphatidylinositol Phosphate Kinase Activity (GO:0016307)	4.89319e-07	4.12426e-06	272.25	3955.86	PIP5K1A;PIP5K1B;PIP5K1C
	Phosphatidylinositol Kinase Activity (GO:0052742)	9.55746e-07	7.04862e-06	209.392	2902.33	PIK3R3;PIP5K1A;PIP5K1B
	Phosphatidylinositol Trisphosphate Phosphatase Activity (GO:0034594)	2.2431e-05	0.000147047	434.152	4647.63	INPP5J;INPP5K
	Phosphatidylinositol Phosphate 4-Phosphatase Activity (GO:0034596)	3.13794e-05	0.000185138	347.304	3601.32	SYNJ1;SYNJ2
	Phosphatidylinositol-3,5-Bisphosphate 3-Phosphatase Activity (GO:0052629)	5.37111e-05	0.000288087	248.05	2438.8	SYNJ1;SYNJ2
	Phosphatidylinositol-3-Phosphate Phosphatase Activity (GO:0004438)	8.19332e-05	0.000402838	192.908	1815.19	SYNJ1;SYNJ2
	Phosphatidylinositol Monophosphate Phosphatase Activity (GO:0052744)	9.82446e-05	0.000445879	173.609	1602.07	SYNJ1;SYNJ2
	Phosphatidylinositol-3,5-Bisphosphate Phosphatase Activity (GO:0106018)	0.000116018	0.000488935	157.818	1430.11	SYNJ1;SYNJ2
	1-Phosphatidylinositol-3-Kinase Regulator Activity (GO:0046935)	0.000135251	0.000498739	144.659	1288.68	PIK3R3;PIK3R5
	Muscle Alpha-Actinin Binding (GO:0051371)	0.000135251	0.000498739	144.659	1288.68	PDLIM5;PDLIM7
	Phosphatidylinositol 3-Kinase Regulator Activity (GO:0035014)	0.00020167	0.000699915	115.71	984.563	PIK3R3;PIK3R5
	Alpha-Actinin Binding (GO:0051393)	0.000373447	0.00122408	82.6253	652.139	PDLIM5;PDLIM7
	Actin Binding (GO:0003779)	0.00149437	0.00464042	14.9962	97.5661	ARPC1A;PDLIM5;PDLIM7
	Vasopressin Receptor Activity (GO:0005000)	0.00623494	0.0183931	208.031	1056.3	INPP5K
	1-Phosphatidylinositol-3-Kinase Activity (GO:0016303)	0.011196	0.0300257	103.995	467.165	PIK3R3
	cAMP Response Element Binding (GO:0035497)	0.011196	0.0300257	103.995	467.165	CREB1
	Phosphatidylinositol 3-Kinase Activity (GO:0035004)	0.0136677	0.0350605	83.1875	357.101	PIK3R3
	Lipid Phosphatase Activity (GO:0042577)	0.0161334	0.0396612	69.316	286.058	INPP5K
	Clathrin Adaptor Activity (GO:0035615)	0.017364	0.040979	63.9808	259.337	DAB2
	Cadherin Binding Involved In Cell-Cell Adhesion (GO:0098641)	0.021047	0.0477605	51.9766	200.681	PDLIM5
	Actinin Binding (GO:0042805)	0.0247168	0.0540107	43.7632	161.936	PDLIM5
	Protein Kinase C Binding (GO:0005080)	0.0440669	0.0928553	23.7381	74.1114	PDLIM5
	Phosphotyrosine Residue Binding (GO:0001784)	0.0476538	0.0969509	21.8607	66.5396	PIK3R3
	Cell-Cell Adhesion Mediator Activity (GO:0098632)	0.0524162	0.103085	19.7748	58.3068	PDLIM5
	Protein Phosphorylated Amino Acid Binding (GO:0045309)	0.0547889	0.104276	18.8741	54.8153	PIK3R3
	Calcium-Dependent Phospholipid Binding (GO:0005544)	0.0571558	0.1043	18.0516	51.6633	SYT11
	Manganese Ion Binding (GO:0030145)	0.0583371	0.1043	17.6667	50.2001	ATP13A2
	SH3 Domain Binding (GO:0017124)	0.0712383	0.123619	14.3082	37.7983	SGIP1
	PDZ Domain Binding (GO:0030165)	0.0747273	0.125969	13.6025	35.2836	SYNJ2
	G Protein-Coupled Peptide Receptor Activity (GO:0008528)	0.0919841	0.150752	10.9095	26.0317	INPP5K
	Phosphatase Activity (GO:0016791)	0.0988	0.157546	10.1082	23.3971	INPP5K
	Phosphatidylinositol Bisphosphate Binding (GO:1902936)	0.110051	0.170868	9.00498	19.8723	ATP13A2
	RNA Polymerase II-specific DNA-binding Transcription Factor Binding (GO:0061629)	0.249345	0.377215	3.62482	5.03457	CREB1
	Microtubule Binding (GO:0008017)	0.259723	0.383091	3.45536	4.65831	SGIP1
	Ubiquitin Protein Ligase Binding (GO:0031625)	0.289134	0.416071	3.0409	3.77334	SYT11
	DNA-binding Transcription Factor Binding (GO:0140297)	0.298983	0.418738	2.92023	3.52579	CREB1
	Ubiquitin-Like Protein Ligase Binding (GO:0044389)	0.305182	0.418738	2.84823	3.38042	SYT11
	Cadherin Binding (GO:0045296)	0.331158	0.436821	2.5756	2.84646	PDLIM5
	Tubulin Binding (GO:0015631)	0.333703	0.436821	2.55114	2.79989	SGIP1
	Zinc Ion Binding (GO:0008270)	0.349611	0.436821	2.40625	2.52881	ATP13A2
	Calcium Ion Binding (GO:0005509)	0.353737	0.436821	2.37077	2.46371	SYT11
	DNA-binding Transcription Activator Activity, RNA Polymerase II-specific (GO:0001228)	0.35538	0.436821	2.35687	2.43834	CREB1
	Cis-Regulatory Region Sequence-Specific DNA Binding (GO:0000987)	0.402341	0.484451	1.49786	1.36373	CREB1;MAZ
	RNA Polymerase II Cis-Regulatory Region Sequence-Specific DNA Binding (GO:0000978)	0.413093	0.48745	1.4639	1.29421	CREB1;MAZ
	Transition Metal Ion Binding (GO:0046914)	0.43839	0.500658	1.78755	1.47409	ATP13A2
	Kinase Binding (GO:0019900)	0.441258	0.500658	1.7716	1.44939	PIP5K1A
	RNA Polymerase II Transcription Regulatory Region Sequence-Specific DNA Binding (GO:0000977)	0.458229	0.510104	1.33329	1.04048	CREB1;MAZ
	Protein Kinase Binding (GO:0019901)	0.476618	0.518444	1.59028	1.17846	PDLIM5
	Metal Ion Binding (GO:0046872)	0.483295	0.518444	1.55889	1.13352	SYT11
	Double-Stranded DNA Binding (GO:0003690)	0.562421	0.592551	1.24076	0.714059	CREB1
	Sequence-Specific Double-Stranded DNA Binding (GO:1990837)	0.597746	0.609112	1.12401	0.578402	CREB1
	Sequence-Specific DNA Binding (GO:0043565)	0.598788	0.609112	1.12075	0.574774	CREB1
	RNA Binding (GO:0003723)	0.839617	0.839617	0.548611	0.0959026	MAZ
