# Supplementary material for: Role of SYT11 in human pan-cancer using comprehensive approaches
Source: Eur J Med Res. 2024 Jun 18;29:338. doi: 10.1186/s40001-024-01931-3 (PMC11186215; doi:10.1186/s40001-024-01931-3)
Supplement: Supplementary file 6 — Supplementary Material 6. [file 40001_2024_1931_MOESM6_ESM.xlsx]

## Sheet: Sheet1
	Cancer Type Abbreviation_miRNAs
	Abbreviation	Cancer type	Abbreviation	Cancer type
	ADCA	Adrenocortical Cancer	BTCA	Biliary Tract Cancer
	BLCA	Bladder Cancer	BNCA	Brain Cancer
	BRCA	Breast Cancer	CECA	Cervical Cancer
	CHOR	Chordoma	COAD	Colon Cancer
	CLCA	Colorectal Cancer	ENCA	Endometrial Cancer
	ESCA	Esophageal Cancer	GBCA	Gallbladder Carcinoma
	GSCA	Gastric Cancer	GAST	Gastrointestinal Stromal Tumor
	HNSC	Head and Neck Cancer	HEGI	Hemangioma
	LIHC	Hepatocellular Carcinoma	KDCA	Kidney Cancer
	LNCA	Larynx Cancer	LEUK	Leukemia
	LICA	Liver Cancer	LUCA	Lung Cancer
	LYMP	Lymphoma	MELA	Melanoma
	MESO	Mesothelioma	NSCA	Neuroendocrine Neoplasia
	NDCA	Neuroendocrine Neoplasia	OPSC	Oropharyngeal Squamous Cell Carcinoma
	OSCA	Oral Squamous Cell Carcinoma	OVCA	Ovarian Cancer
	PNCA	Pancreatic Cancer	PRCA	Prostate Cancer
	RETI	Retinoblastoma	SCRA	Sarcoma
	SKCA	Skin Cancer	SINT	Small Intestinal Neuroendocrine Tumor
	TECA	Testicular Cancer	THCA	Thyroid Cancer
	TOCA	Tonsil Cancer	UTCA	Uterus Cancer
